# Supplementary figures and images for: Early developmental phenotypes in the cystic fibrosis sheep model
Source: PubMed Central journal article supplement — FASEB Bioadv. 2022 Oct 31;5(1):13–26. doi: 10.1096/fba.2022-00085 (PMC9832529; doi:10.1096/fba.2022-00085), 2022-10-31

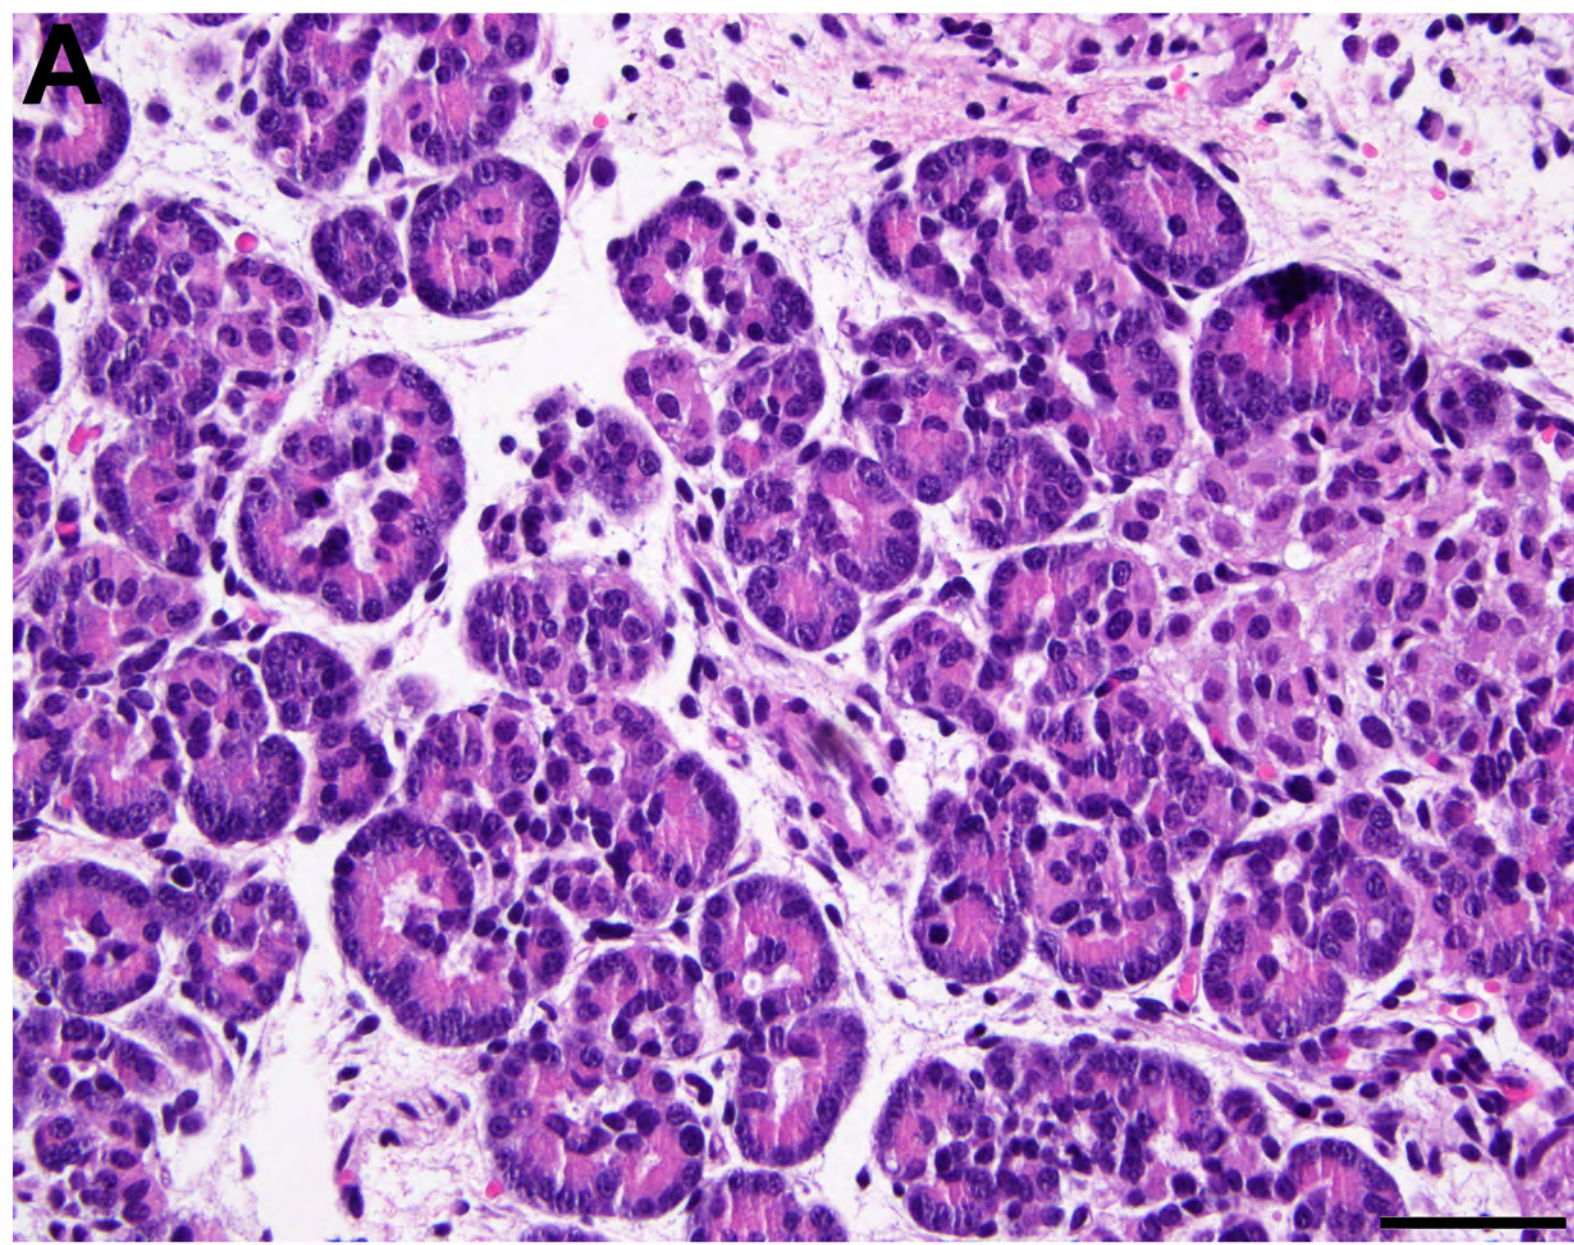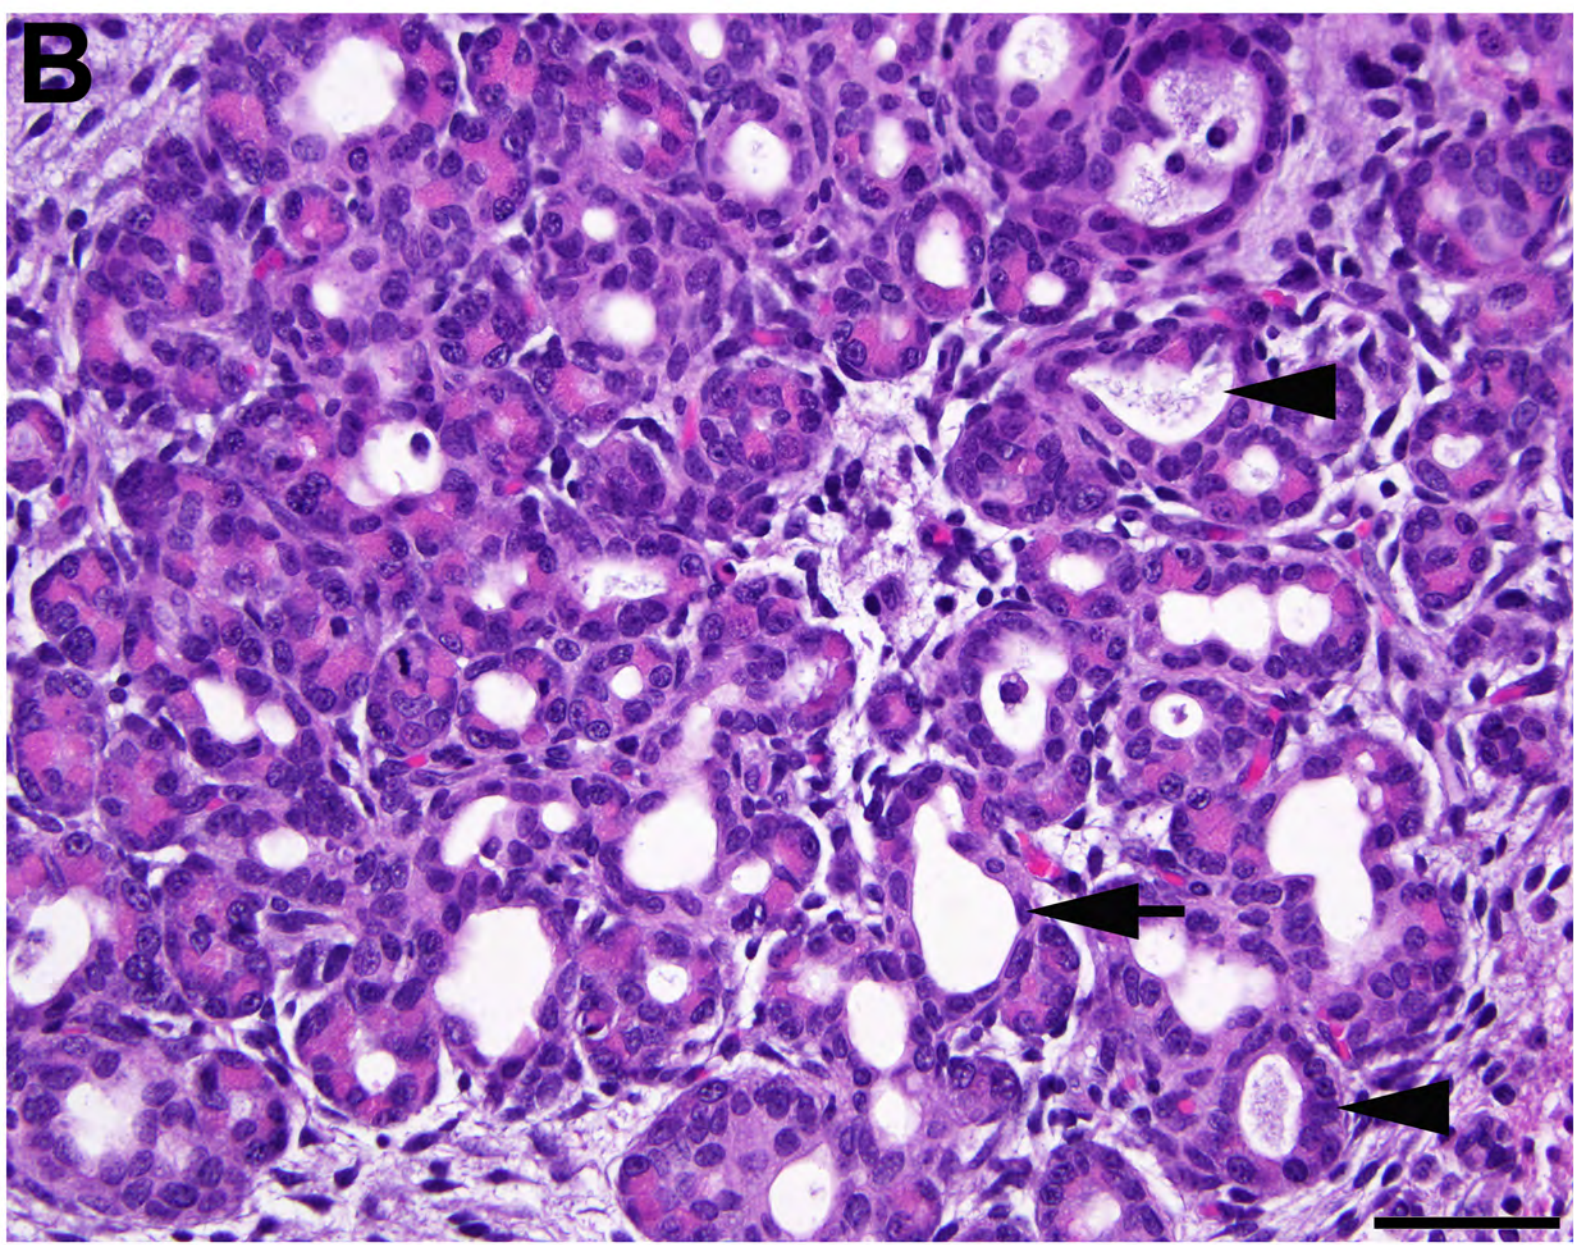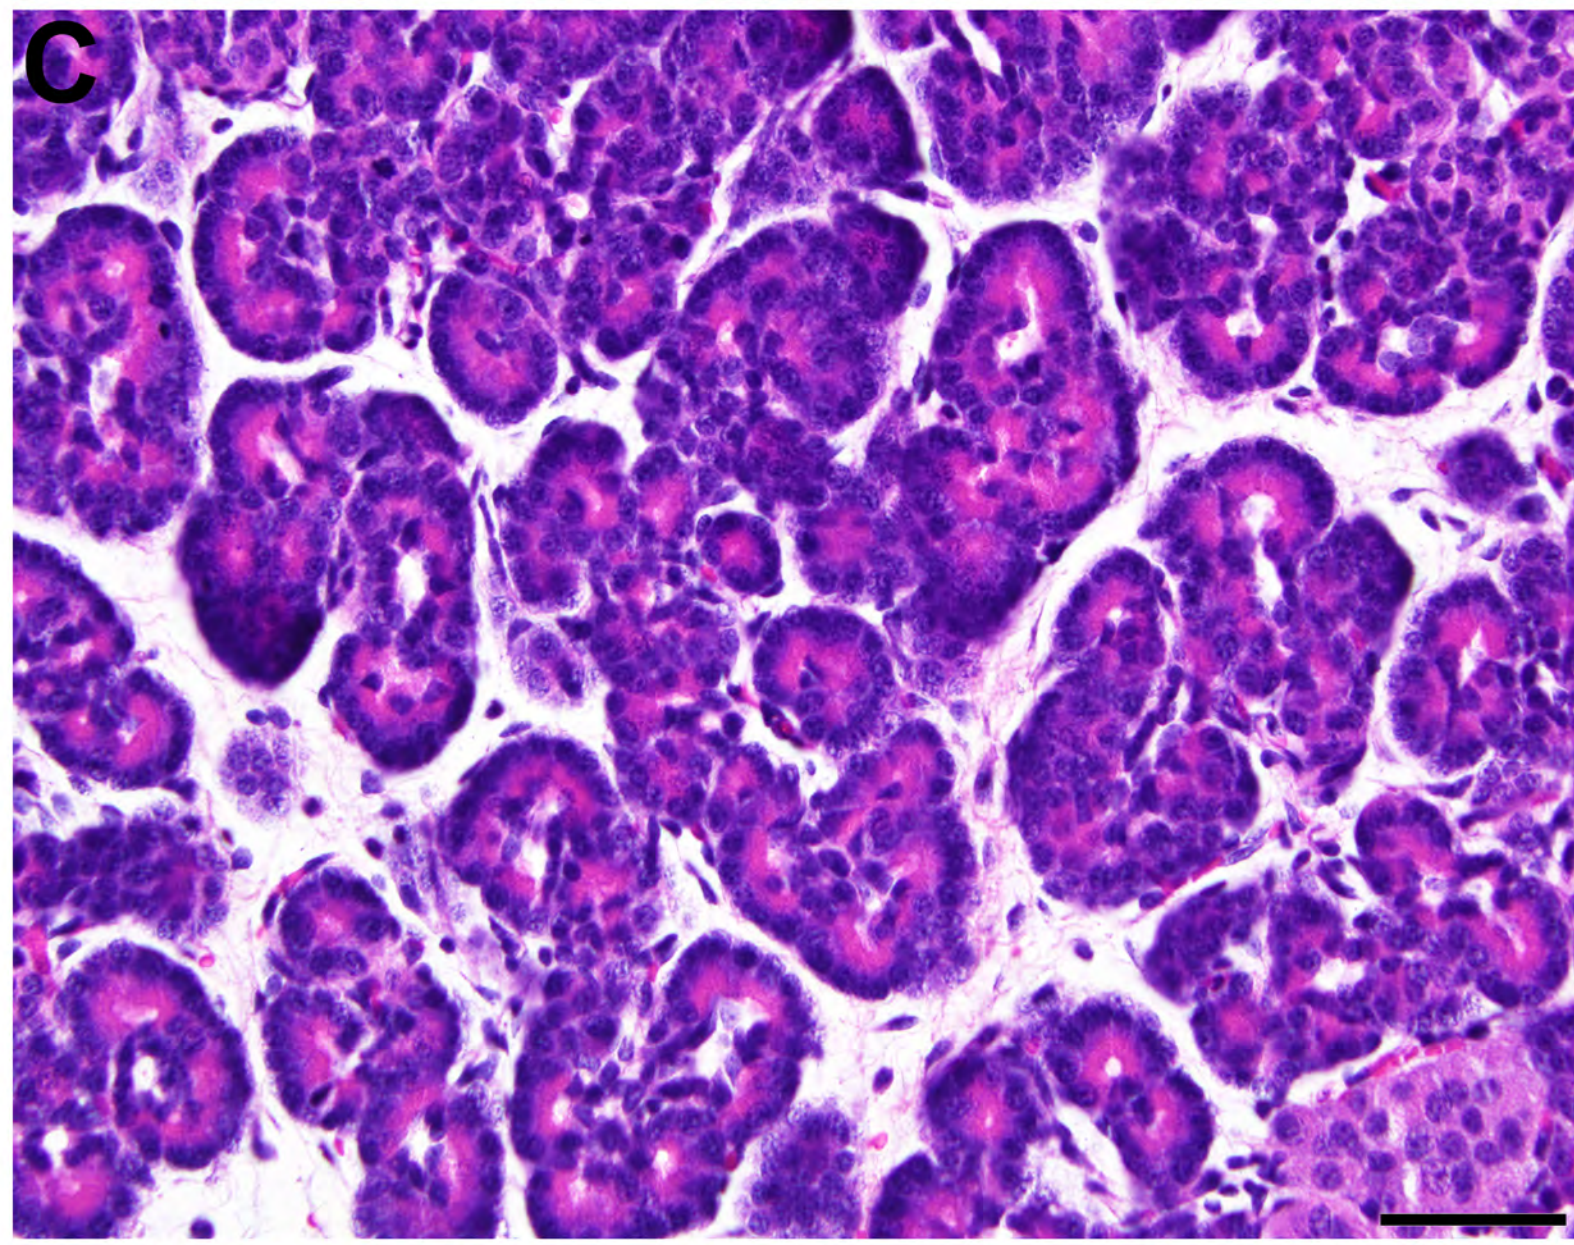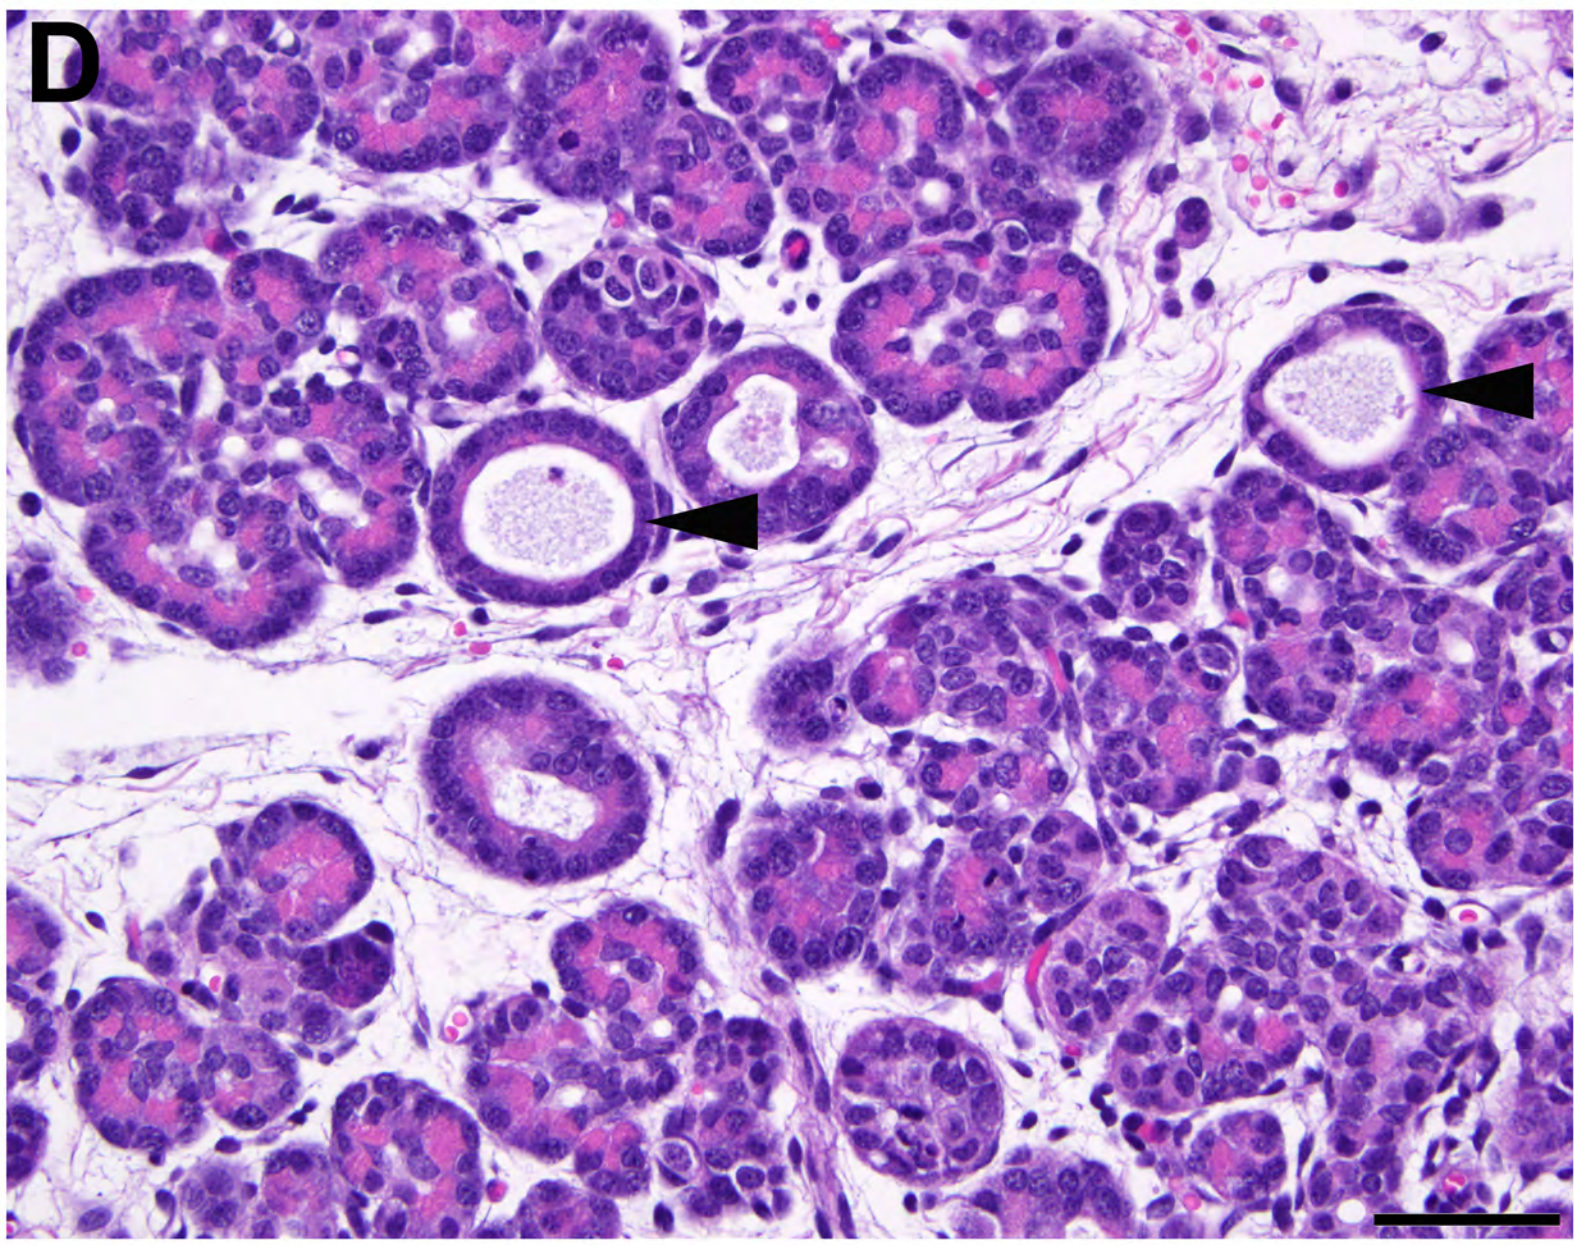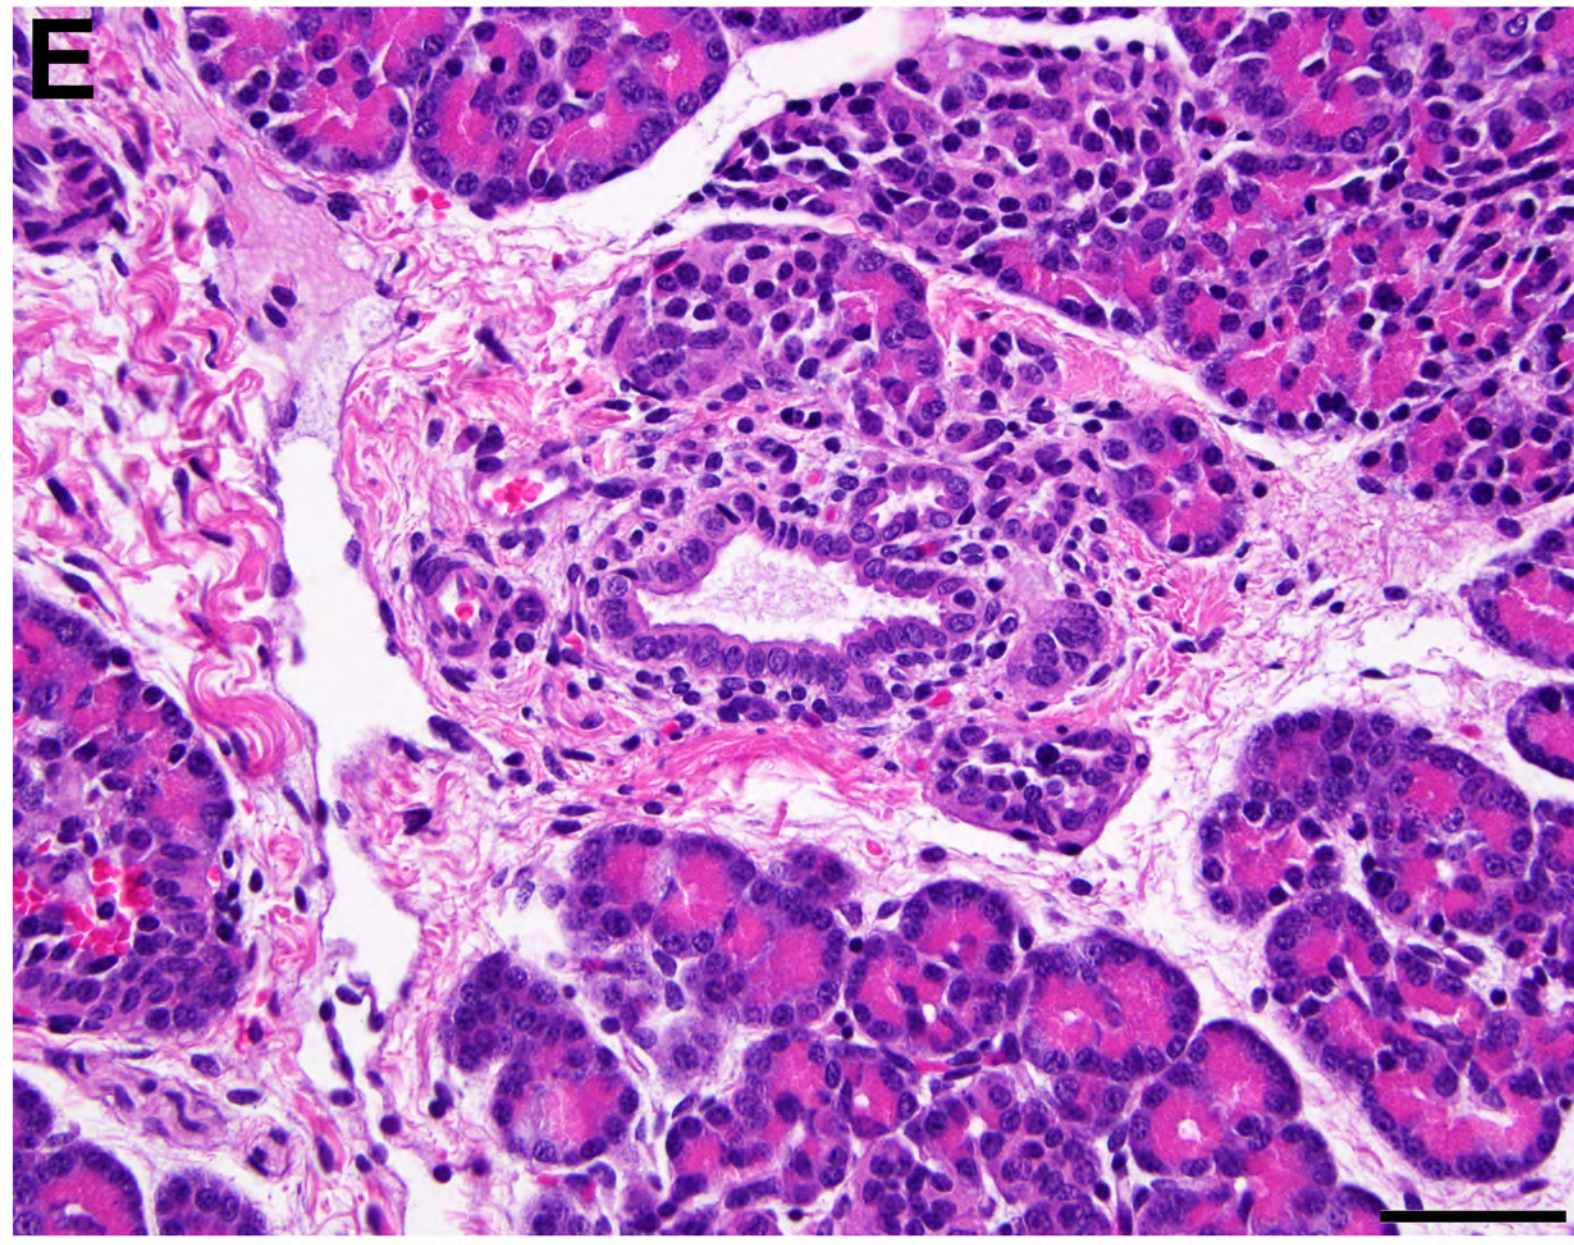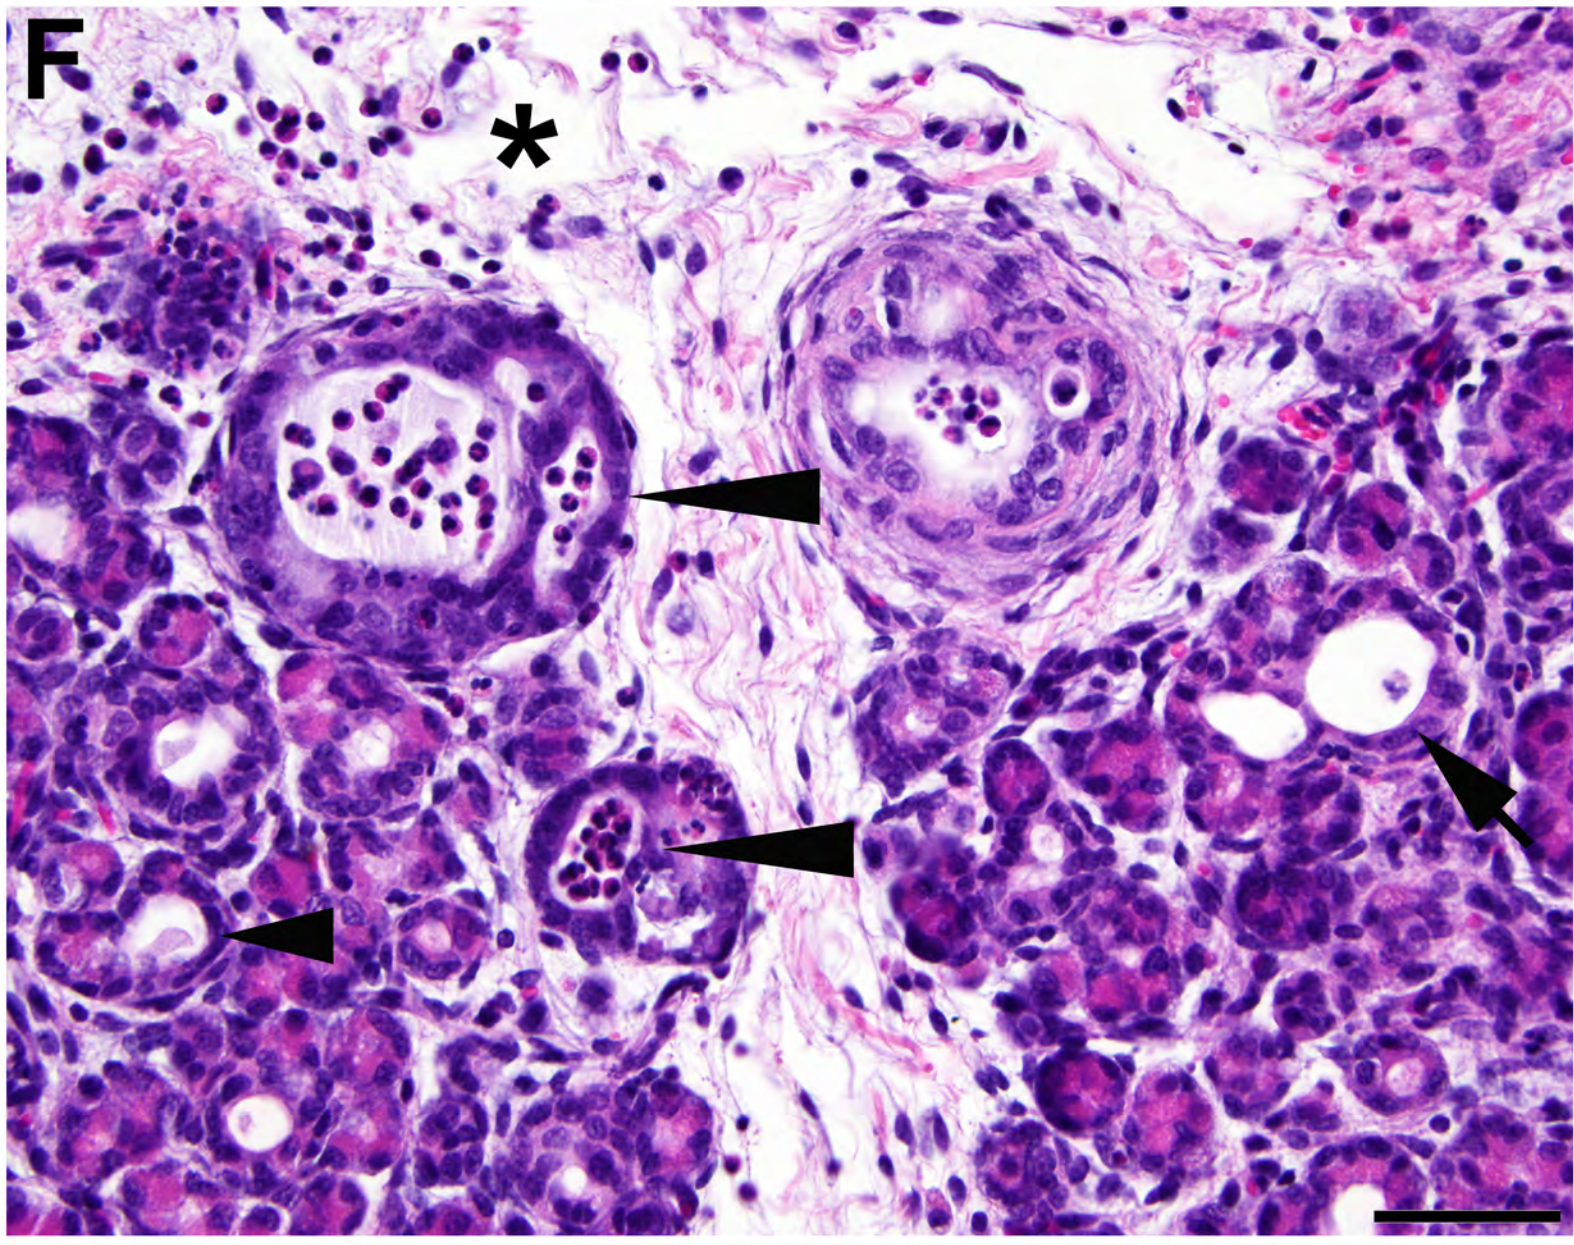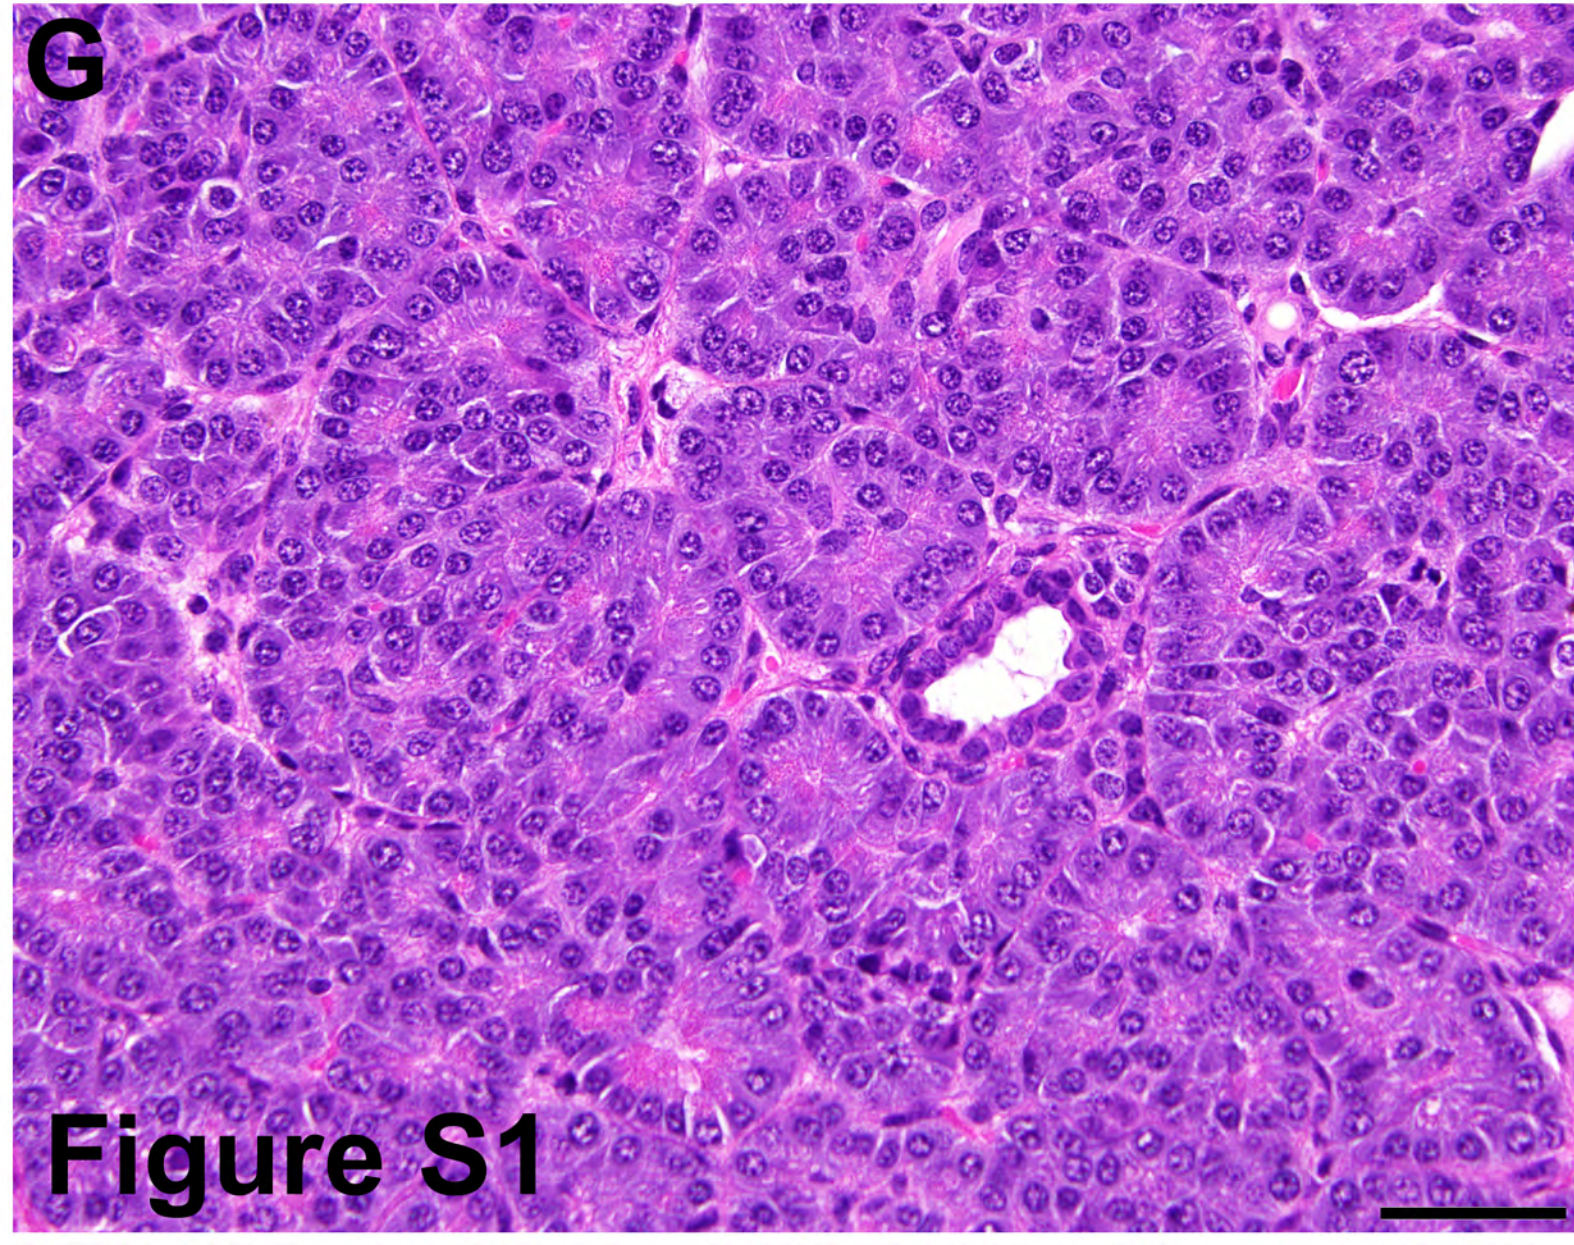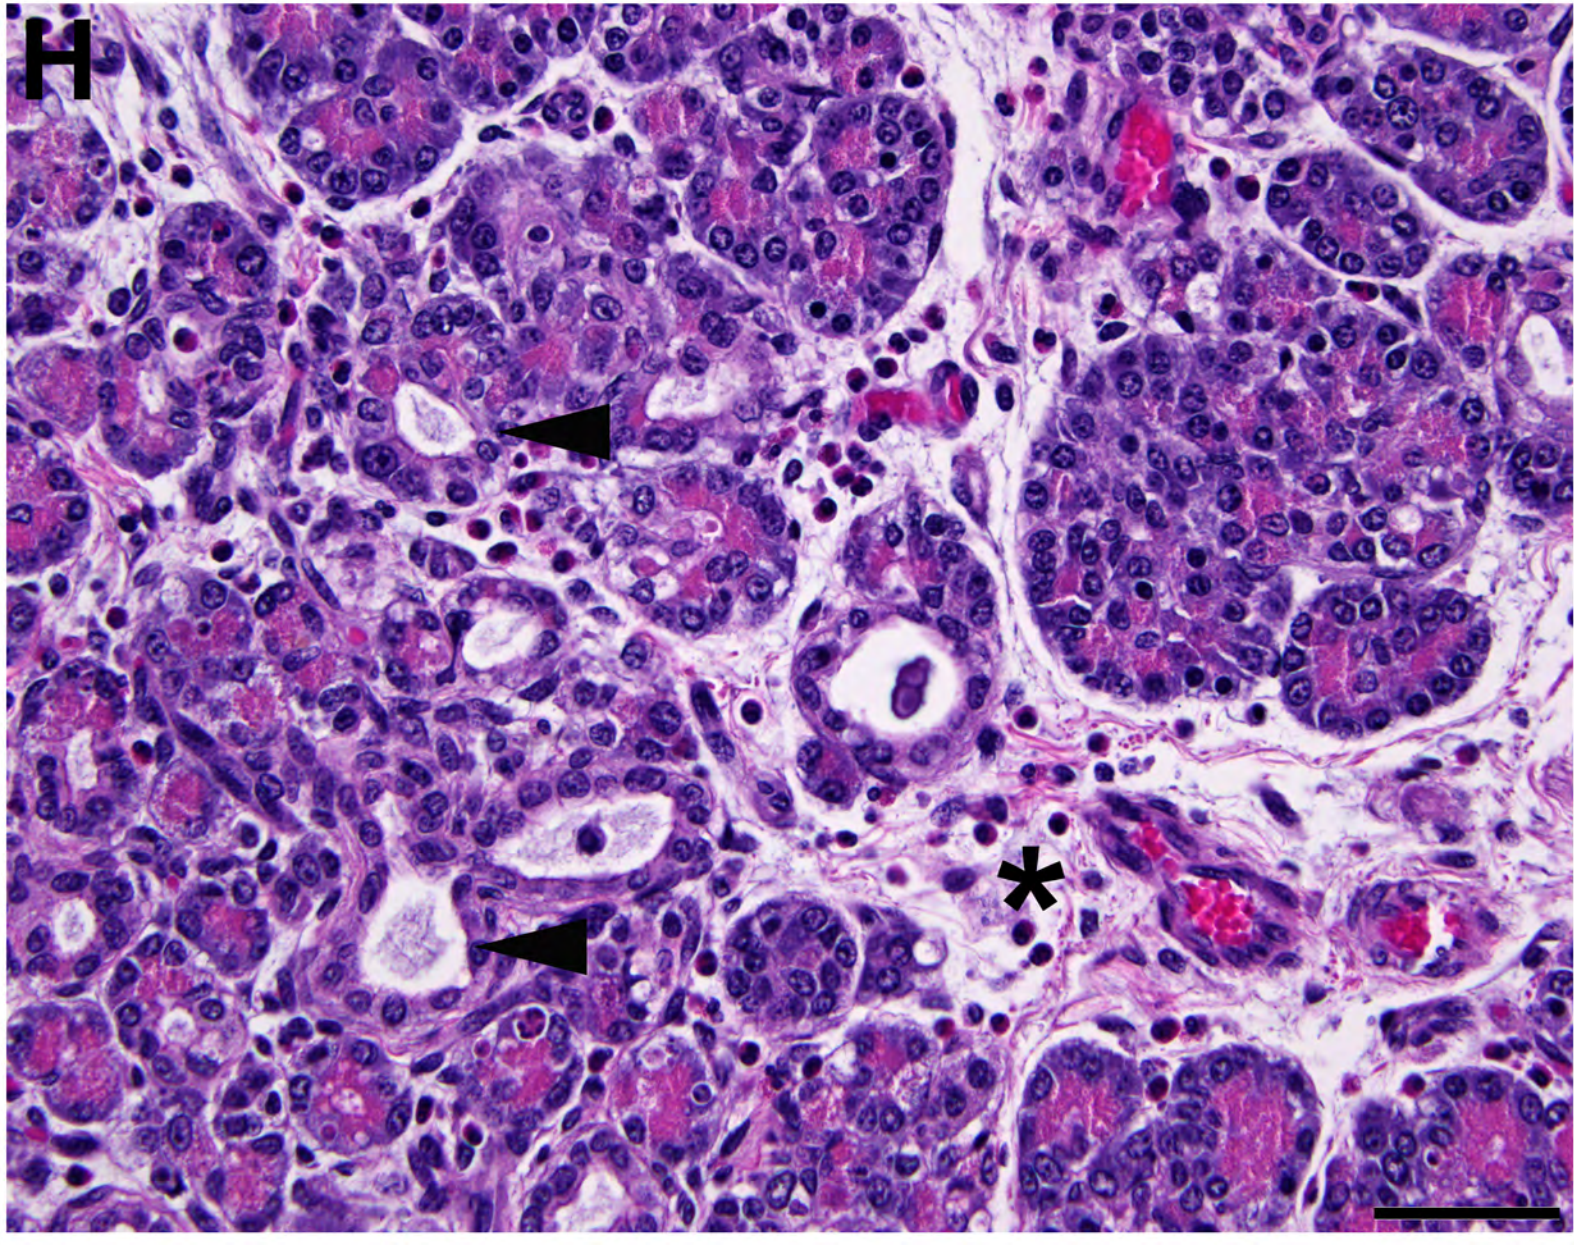

**Figure S1**

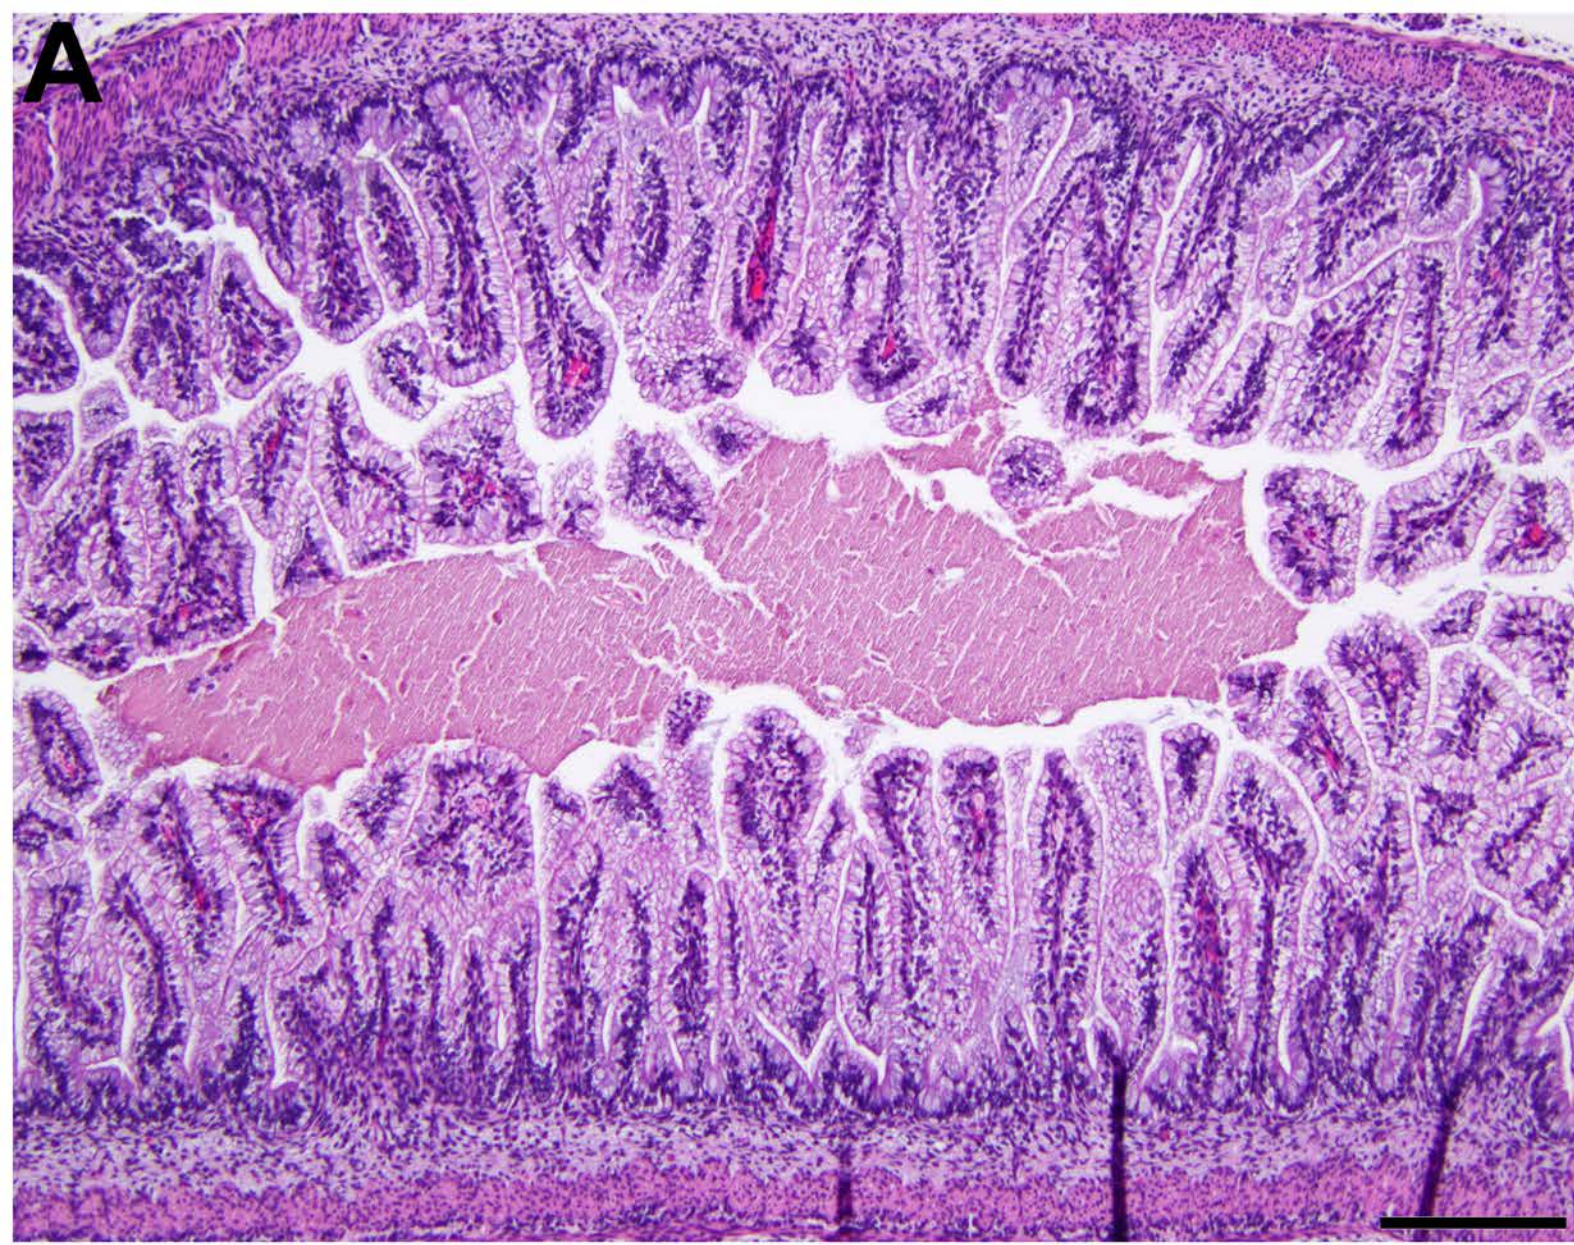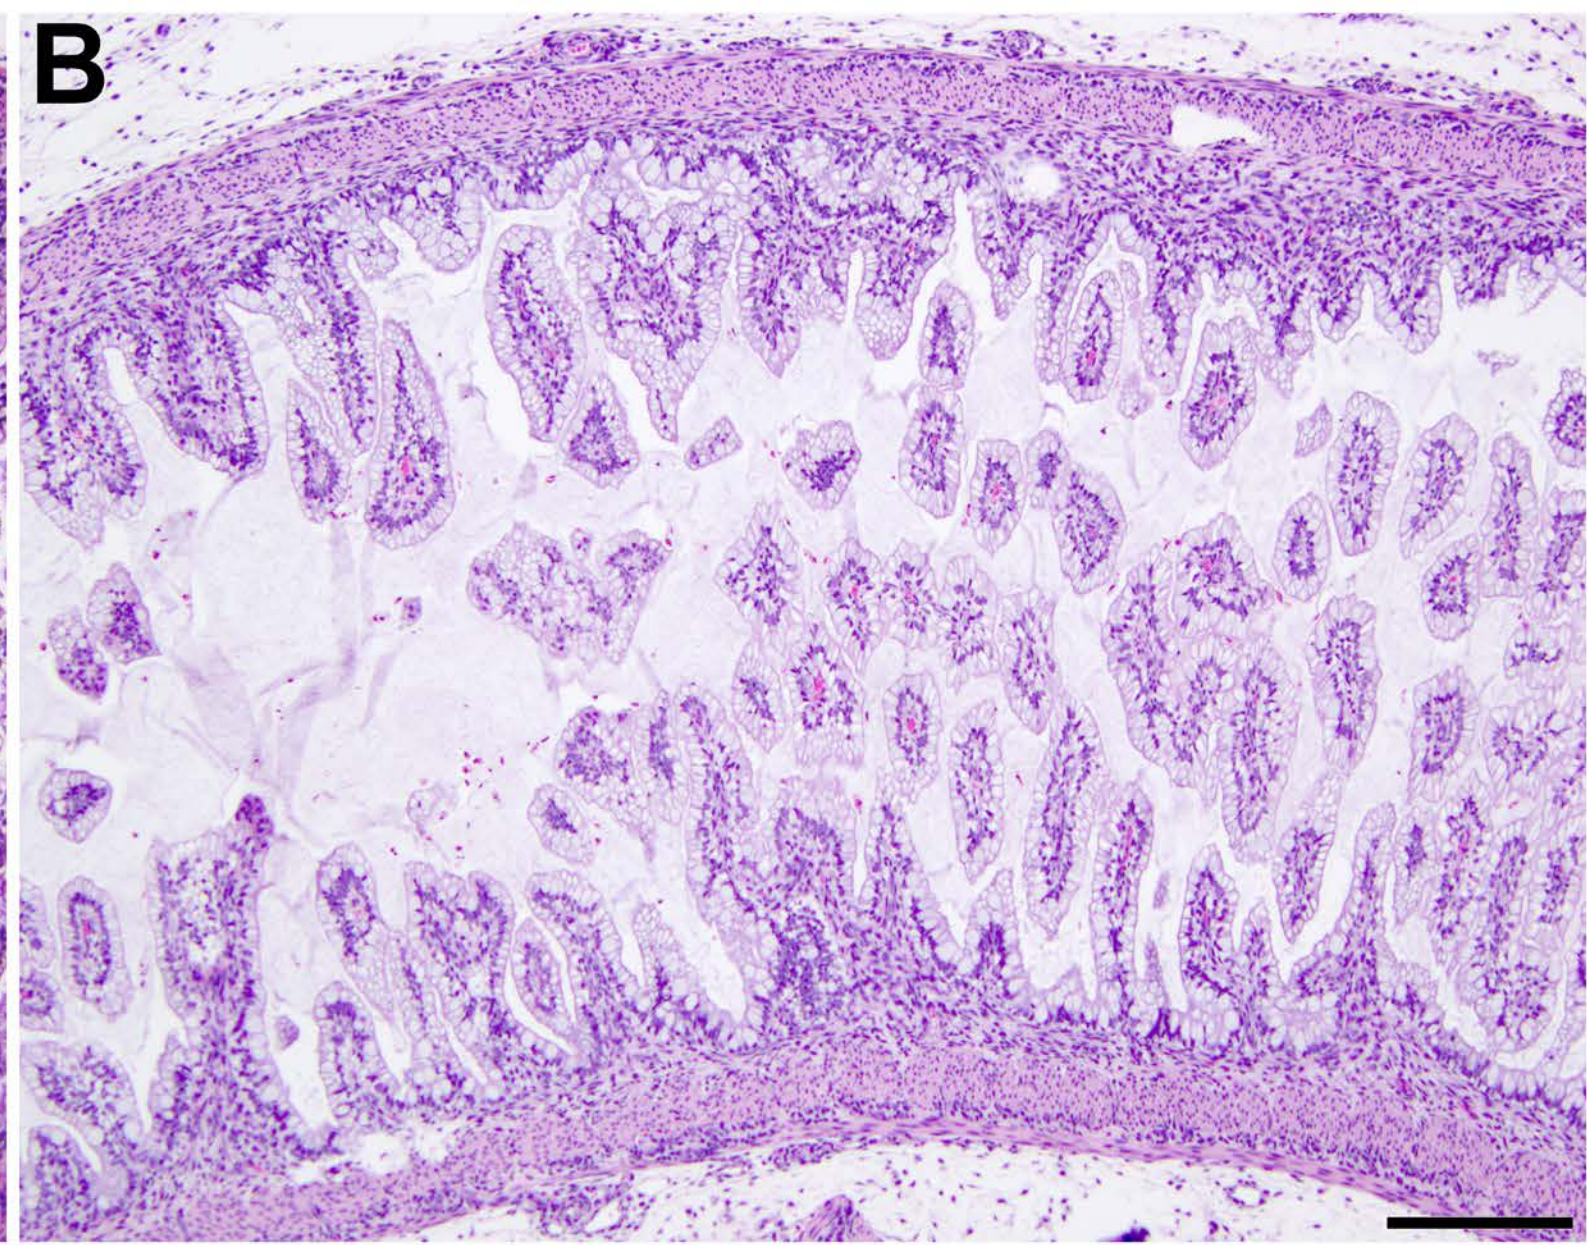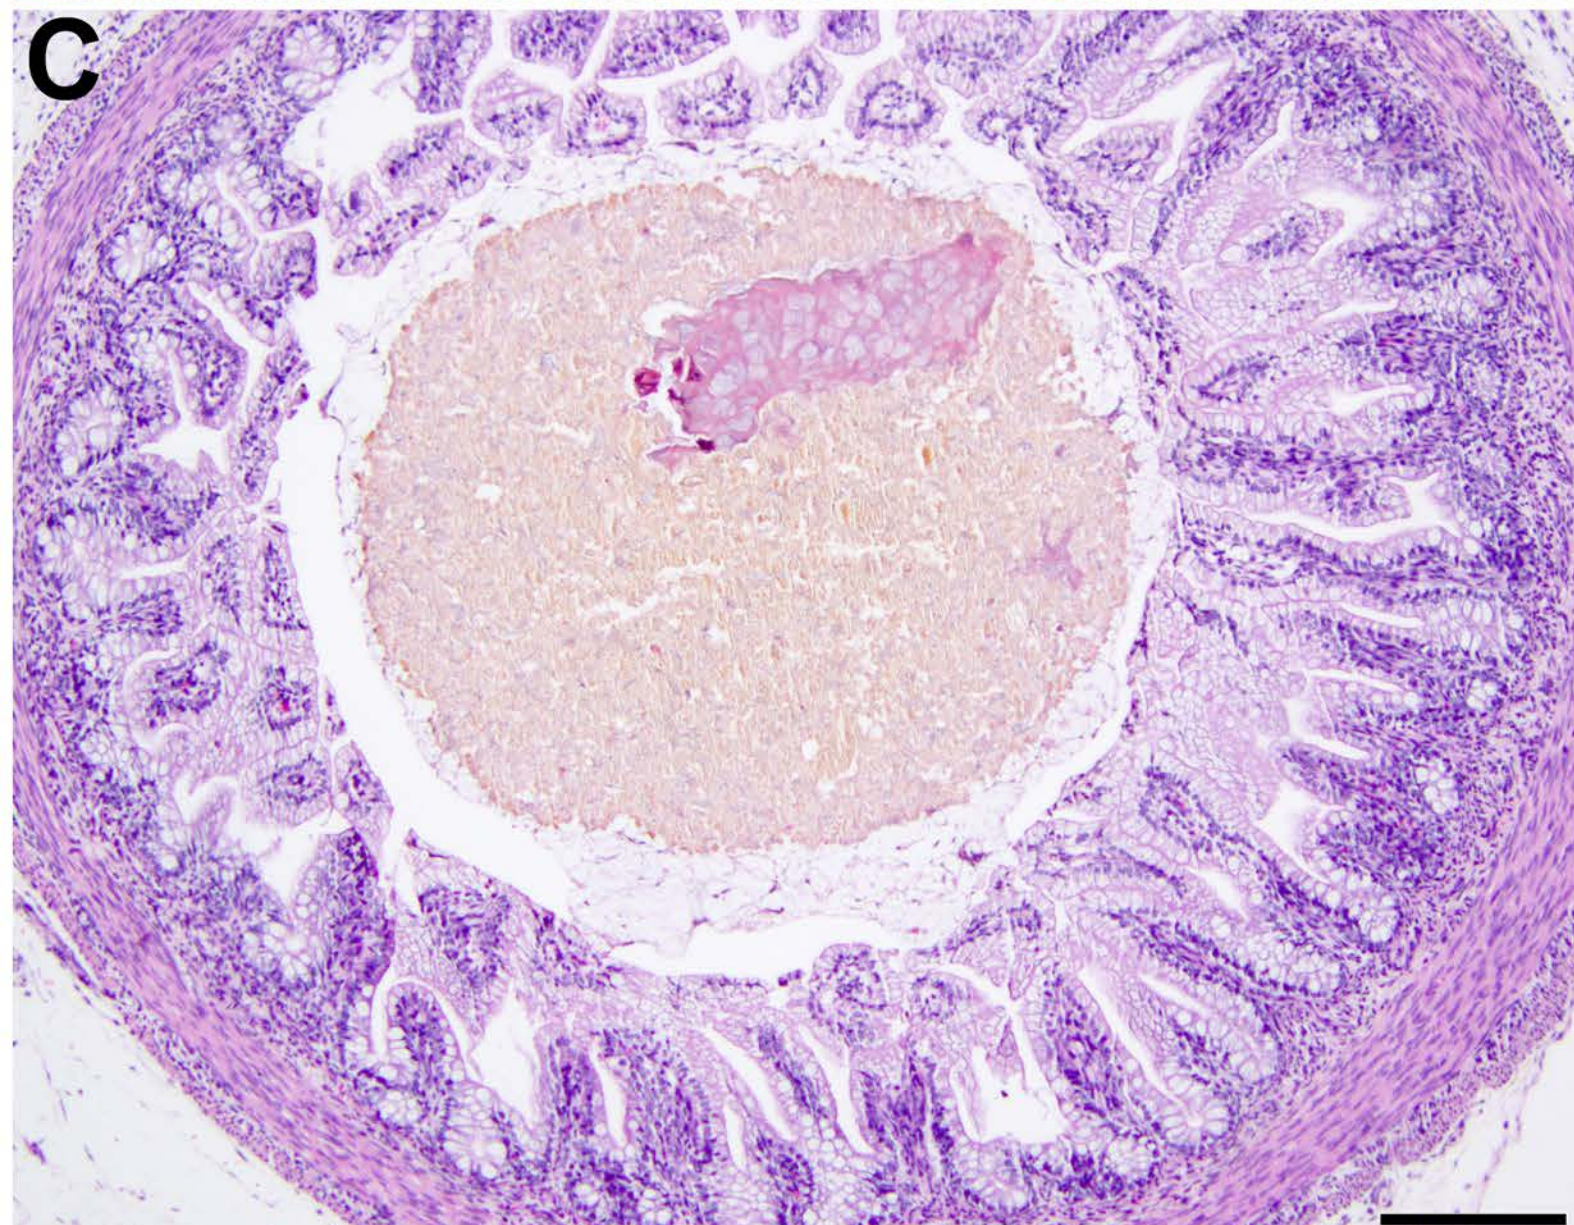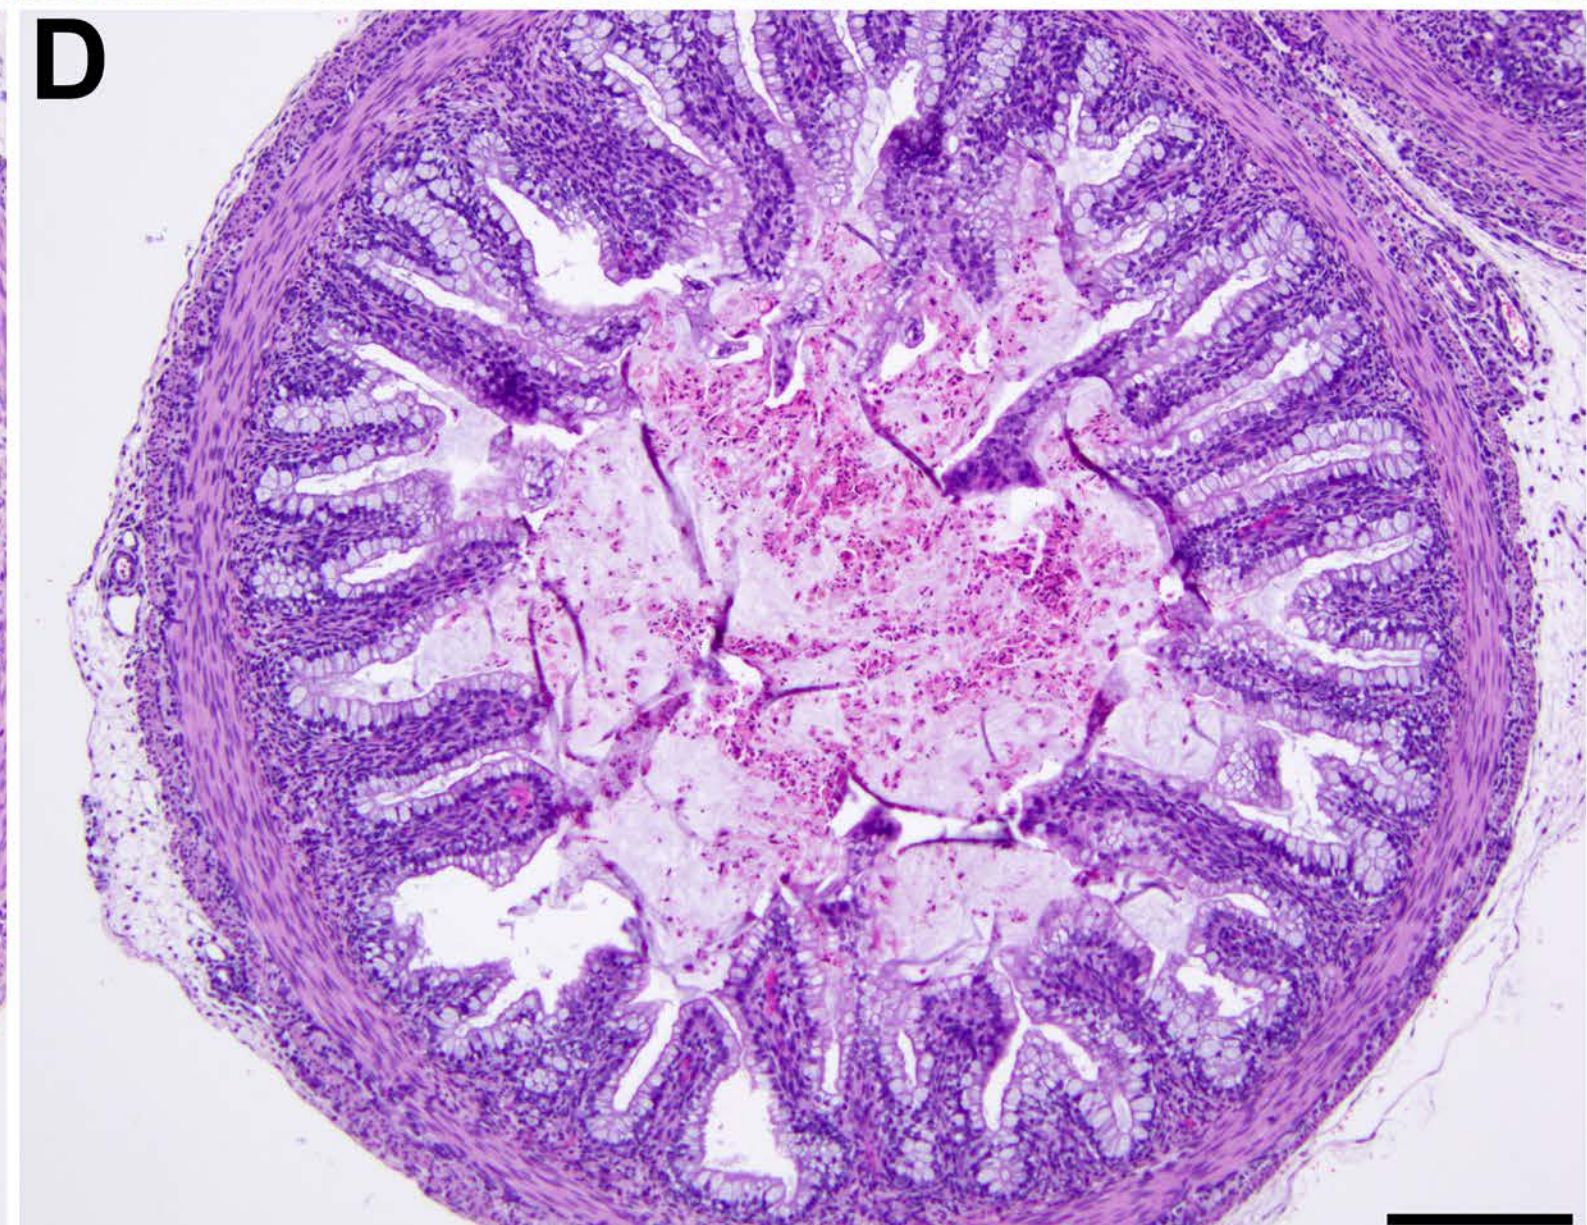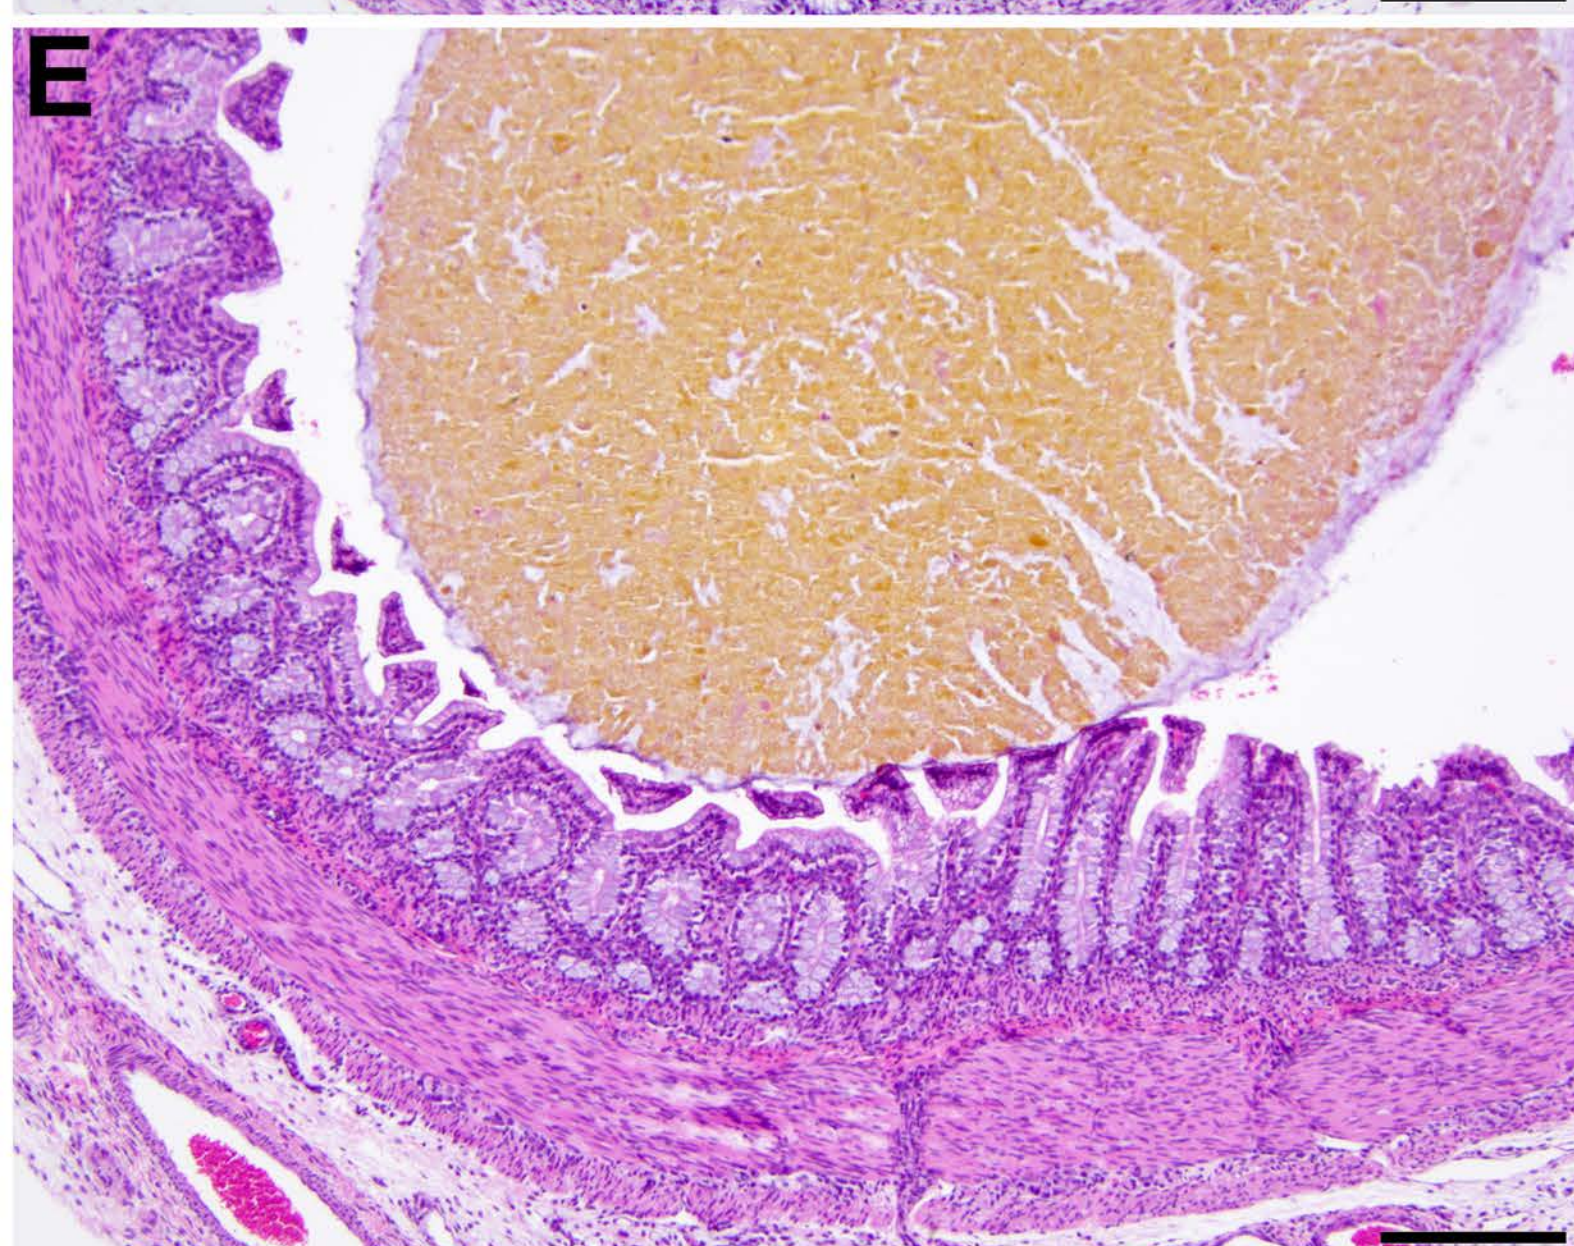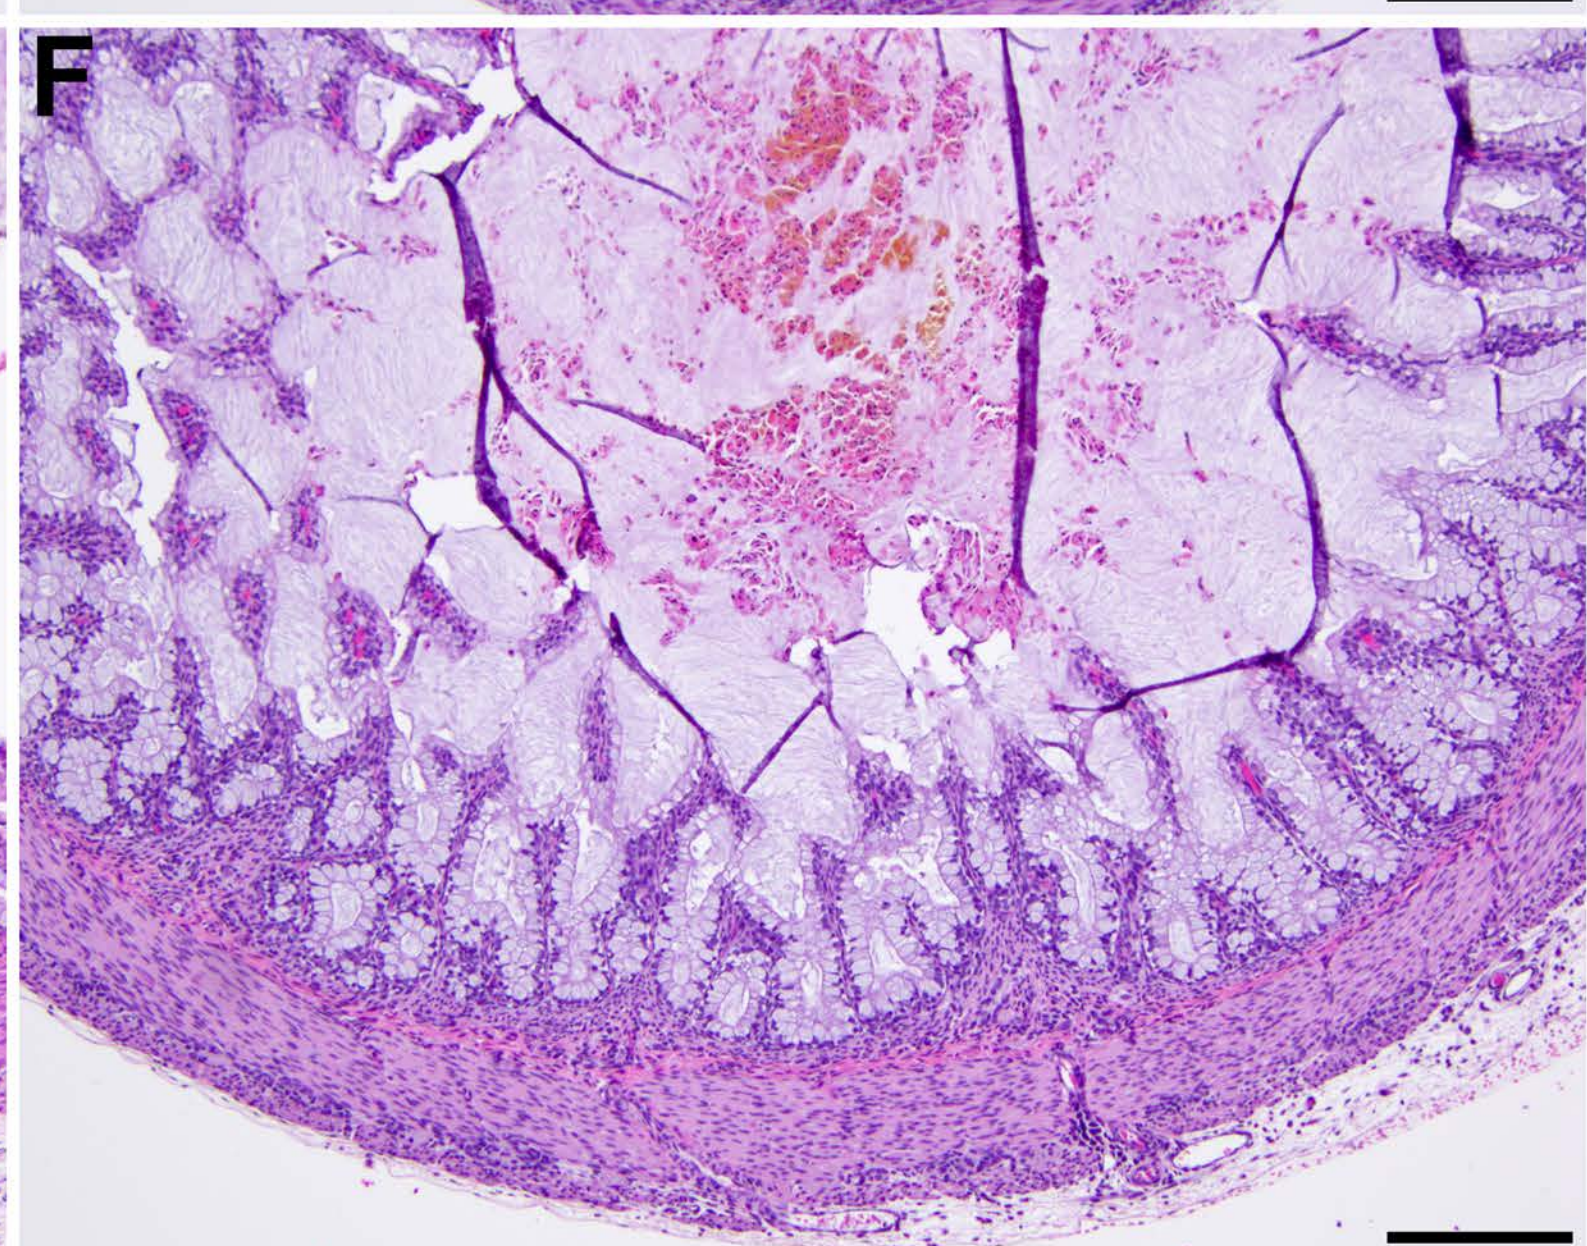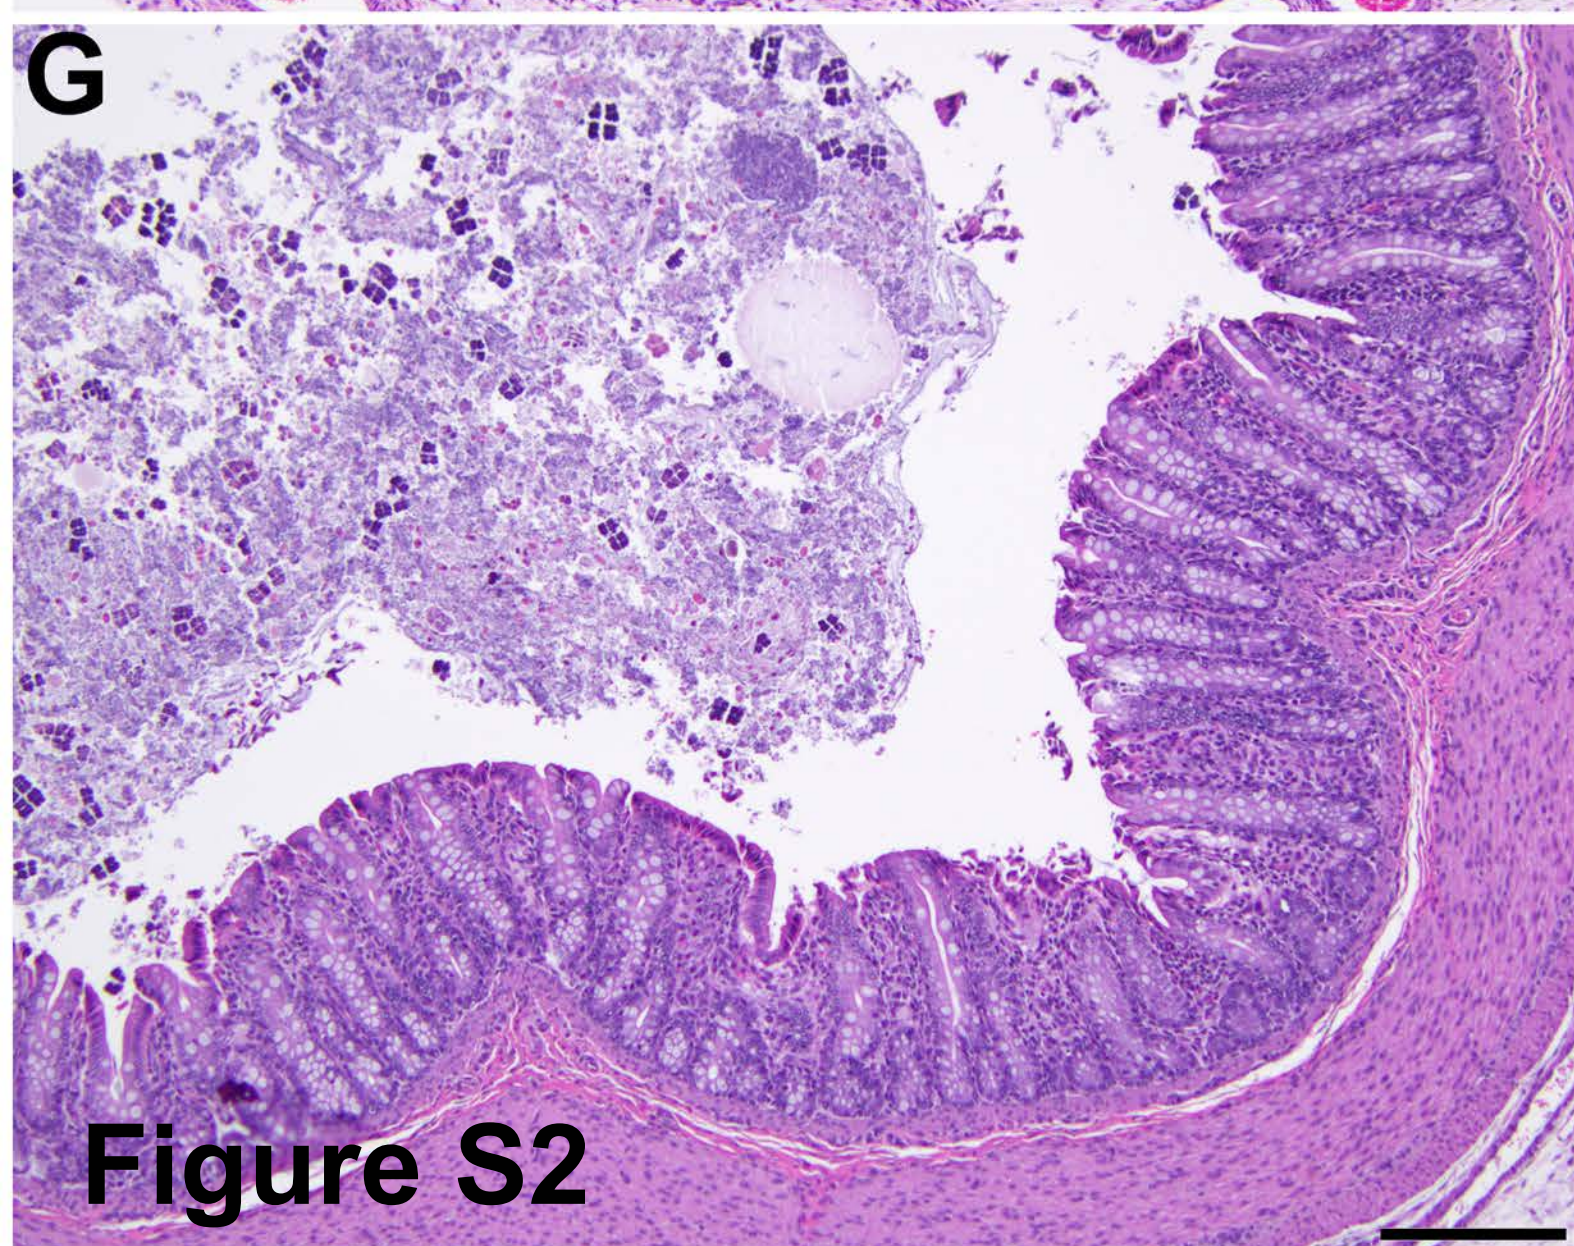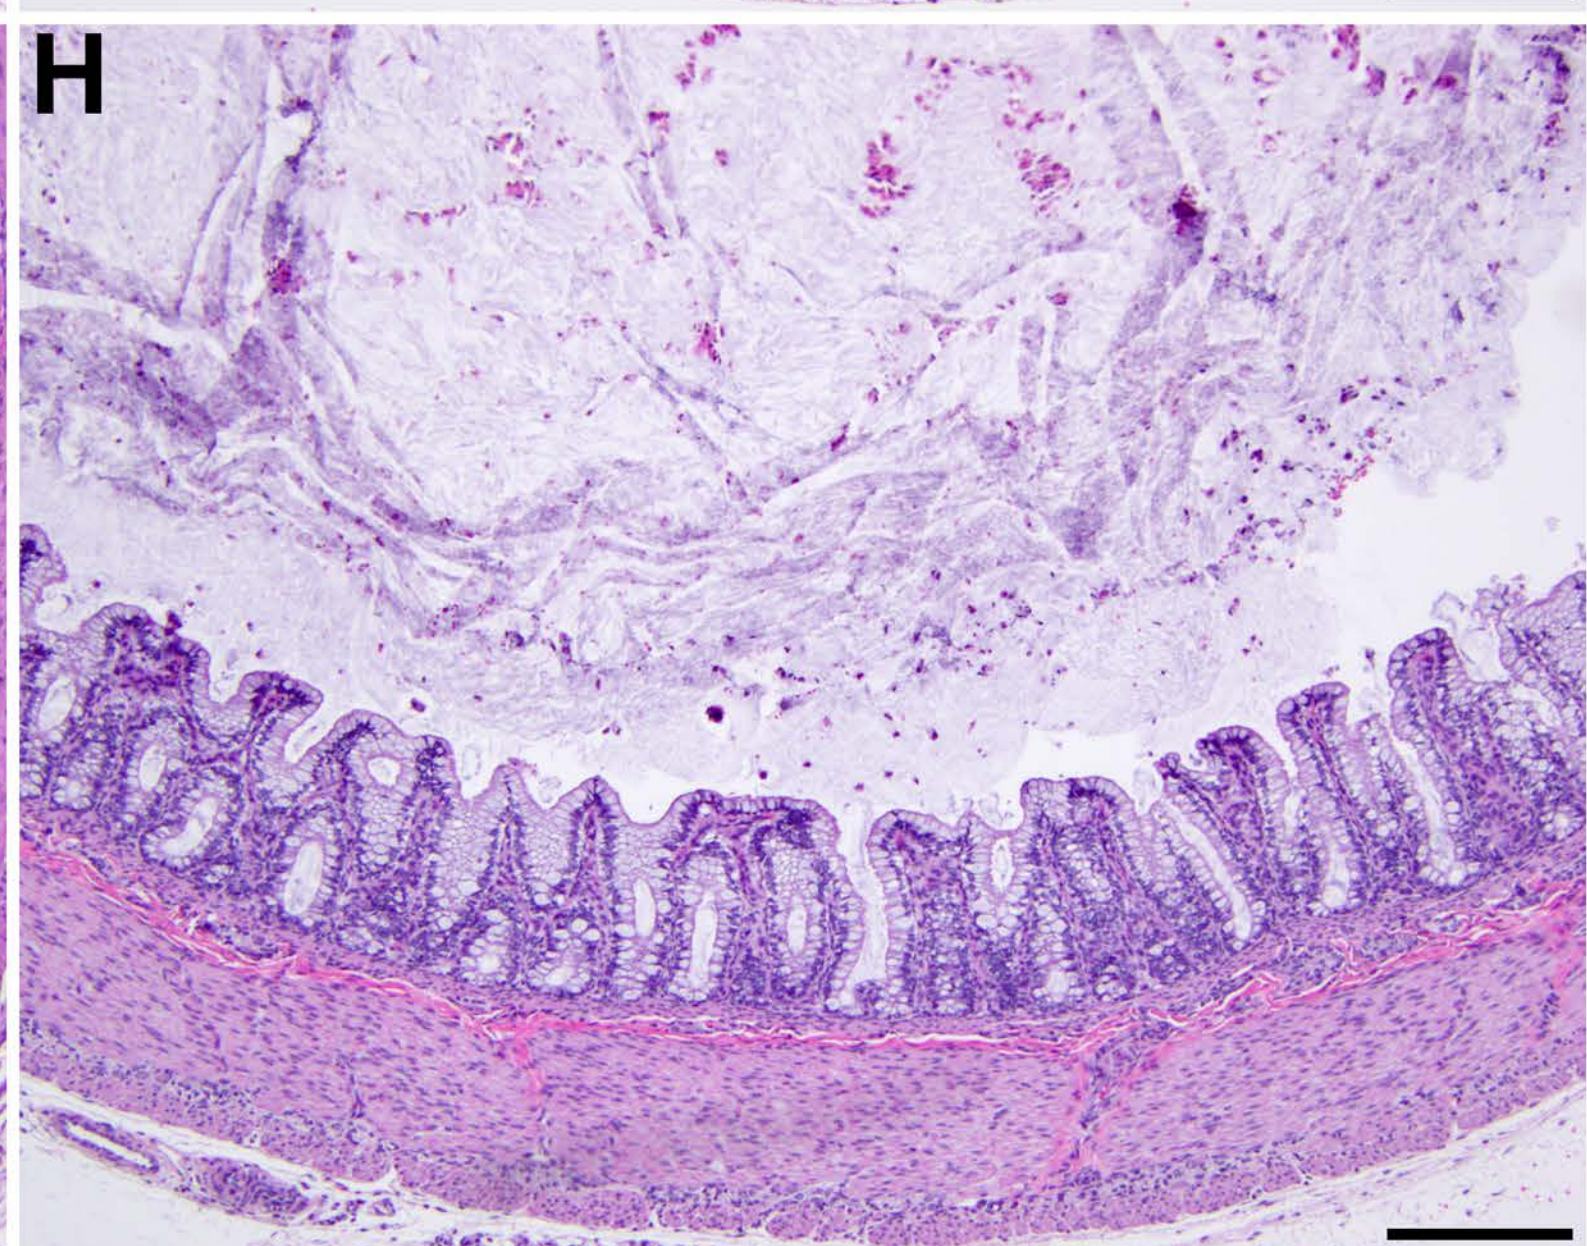

**Figure S2**

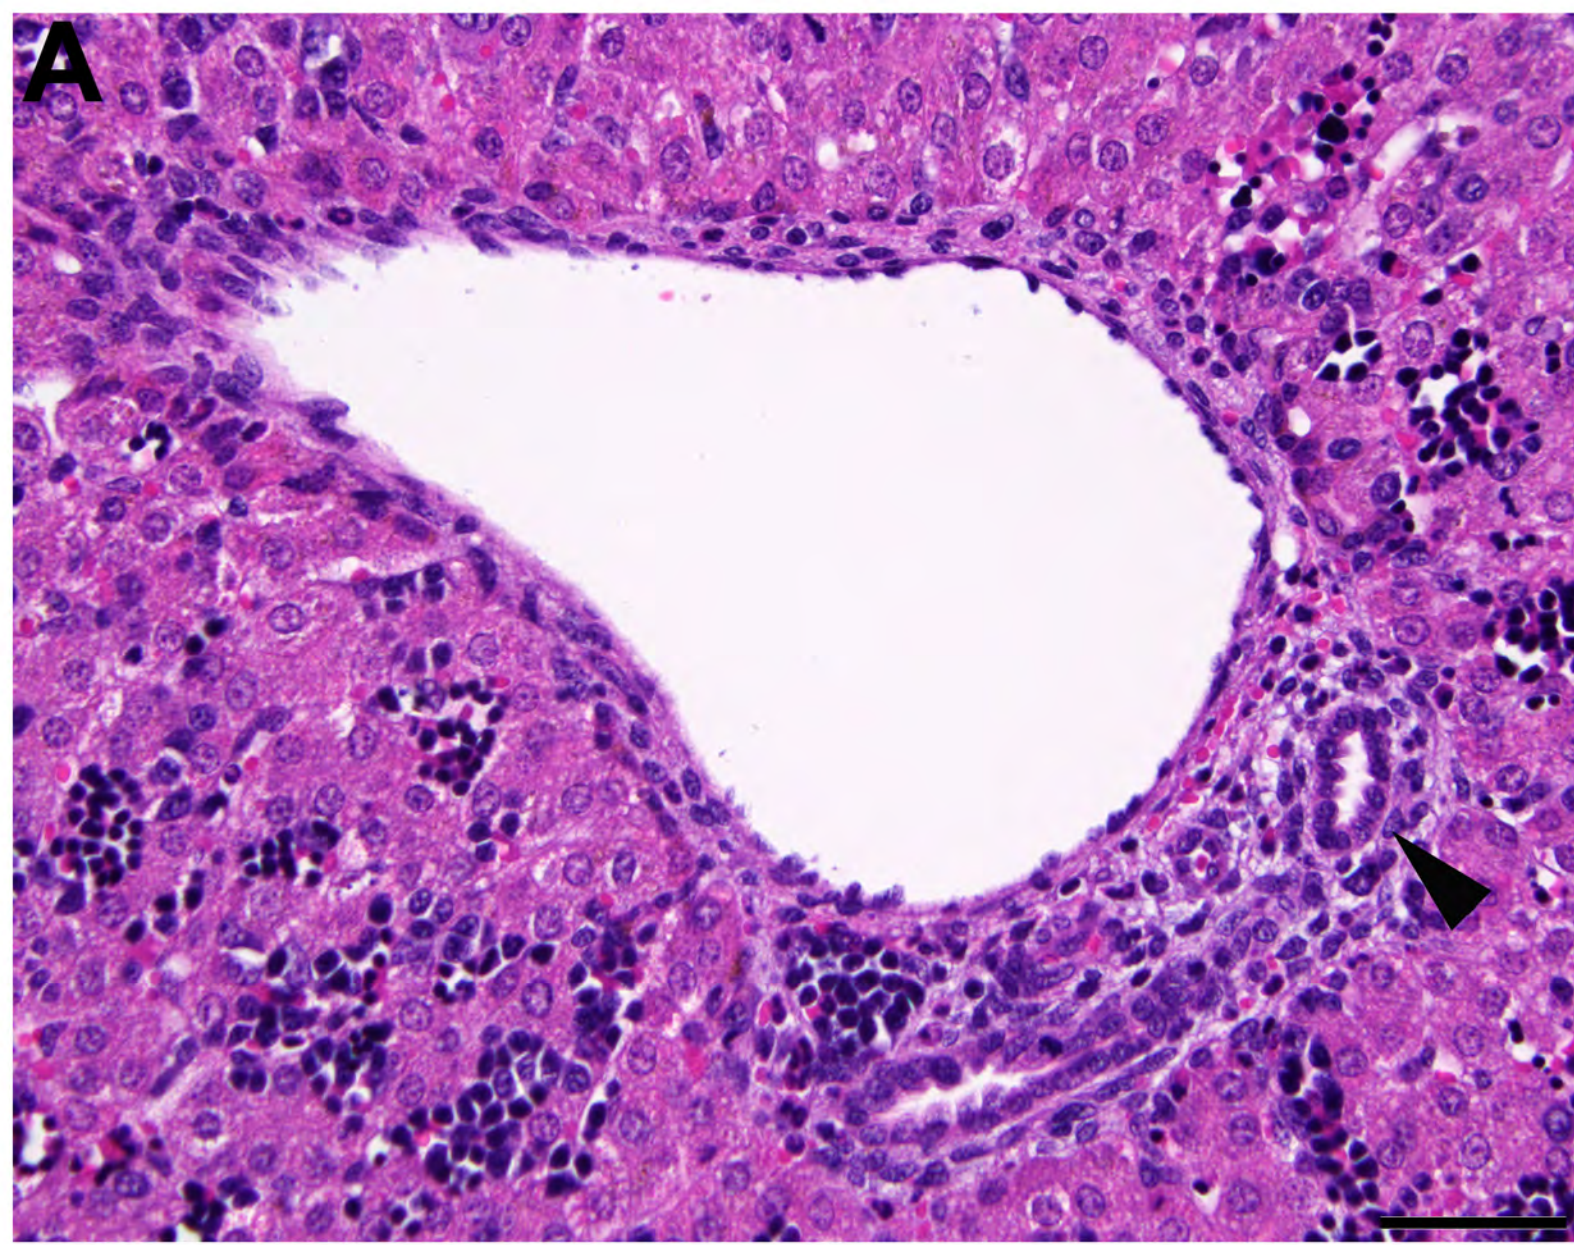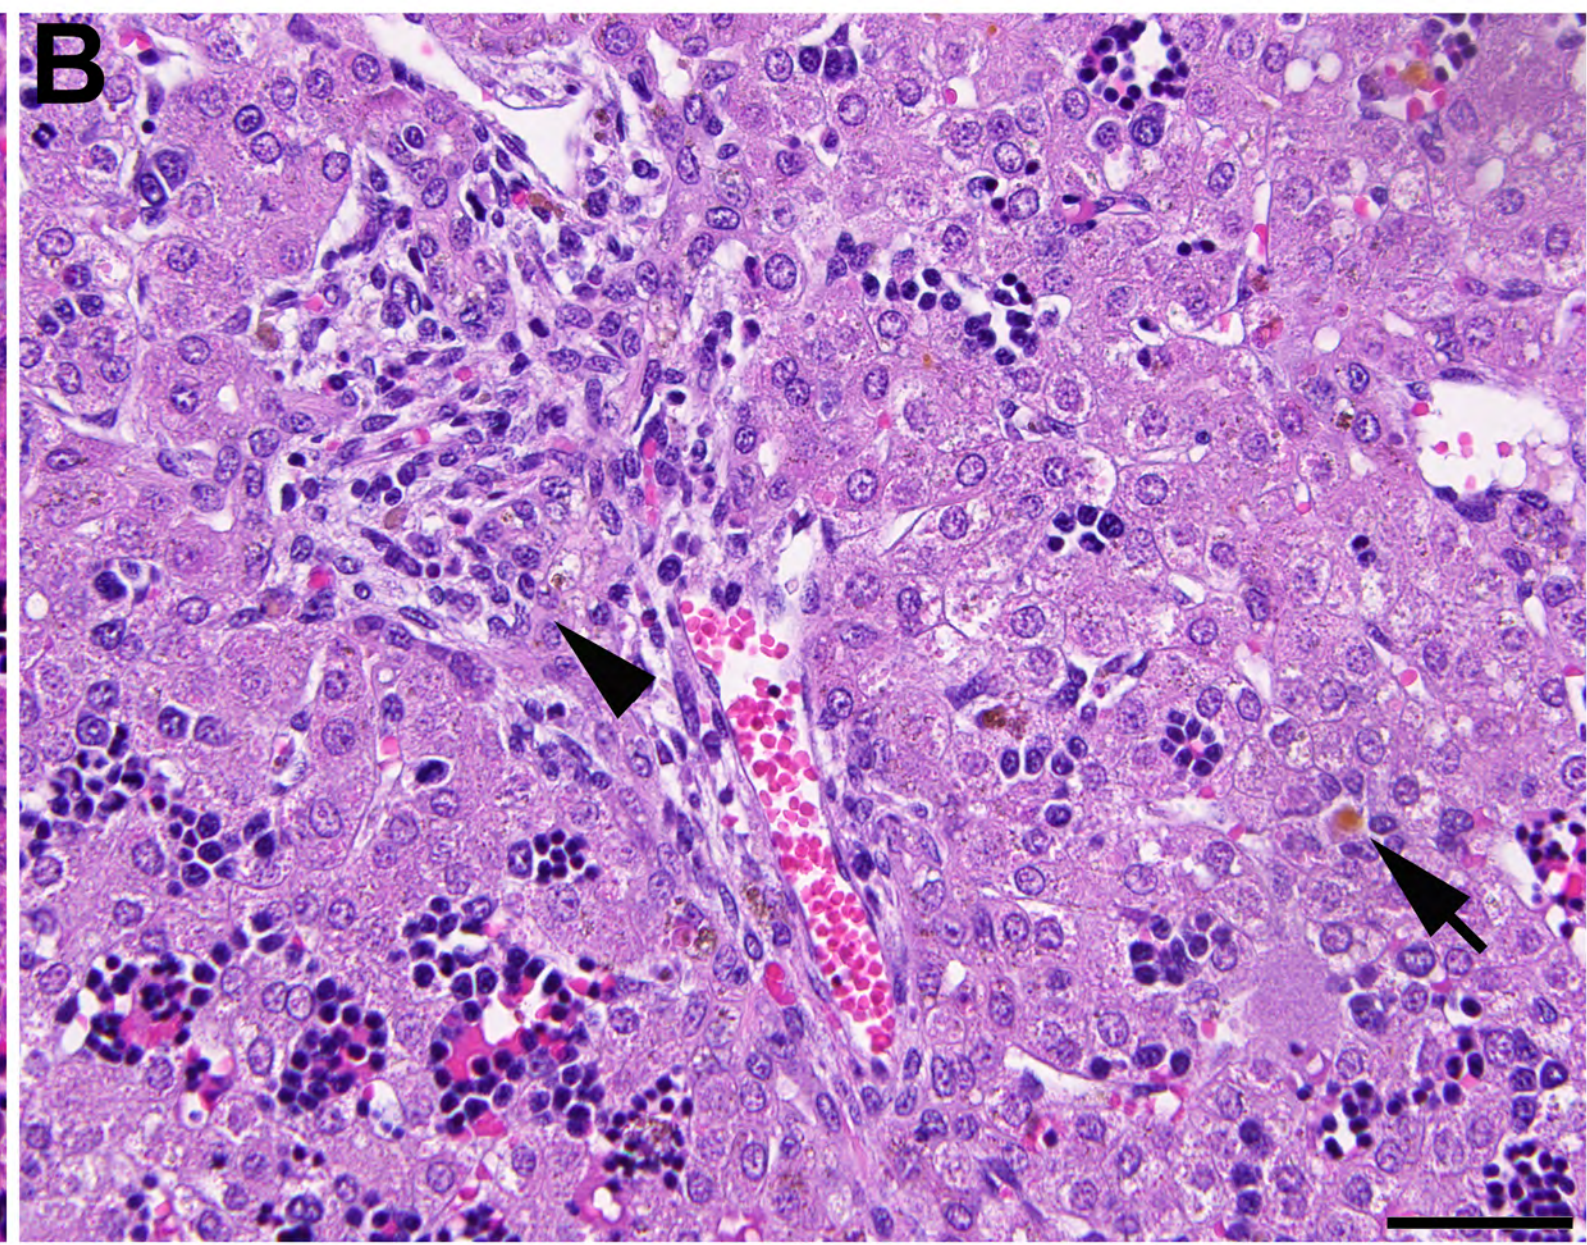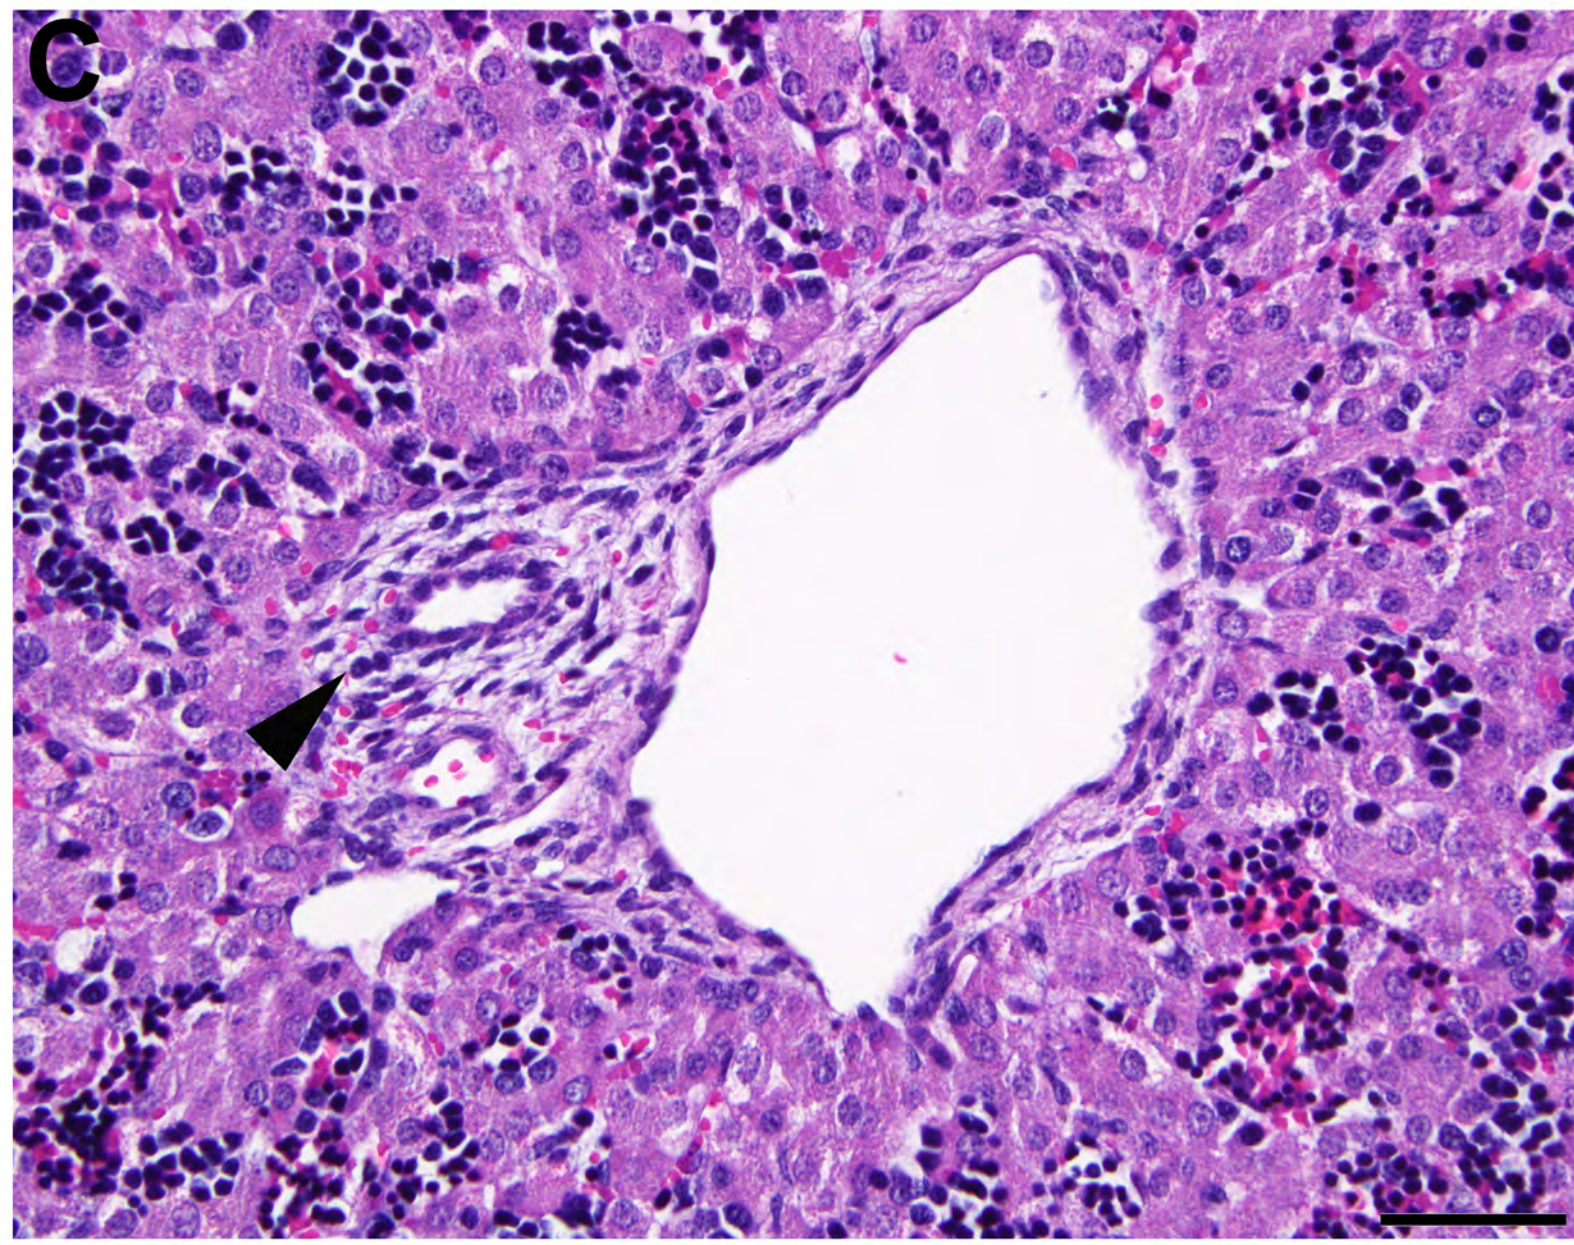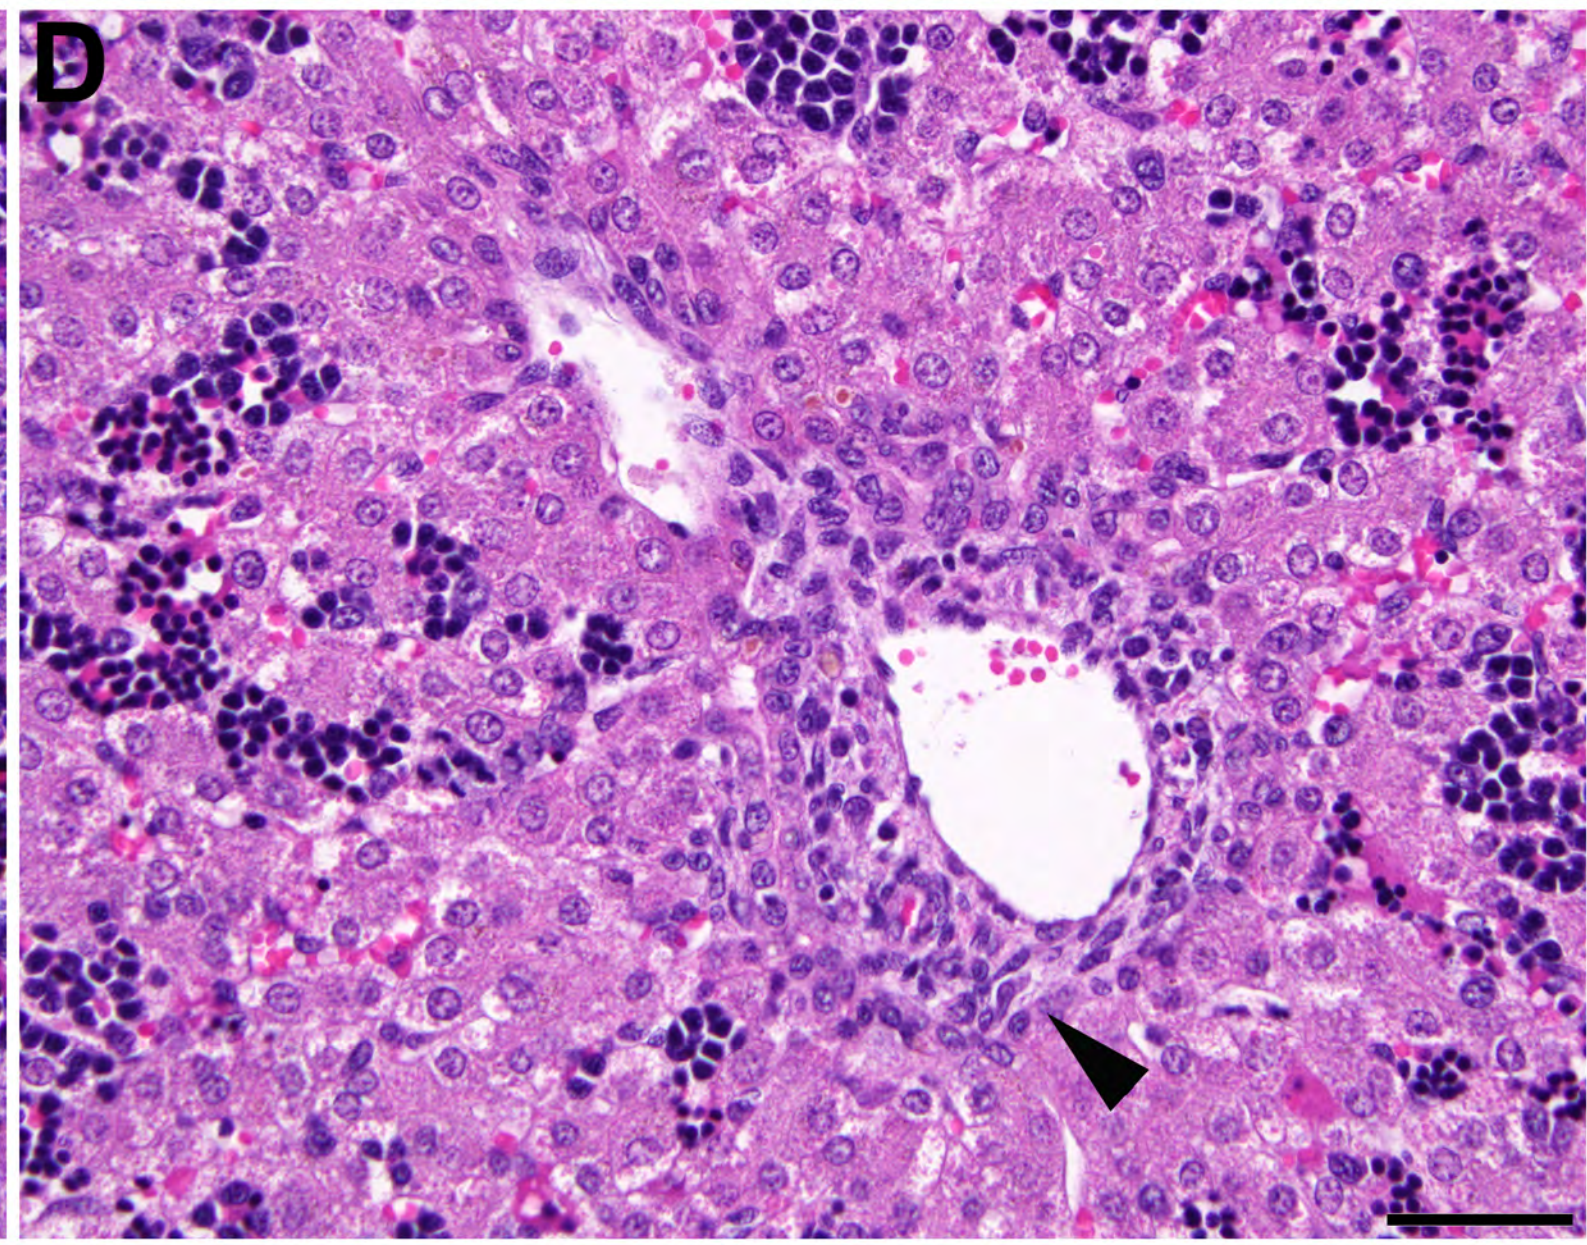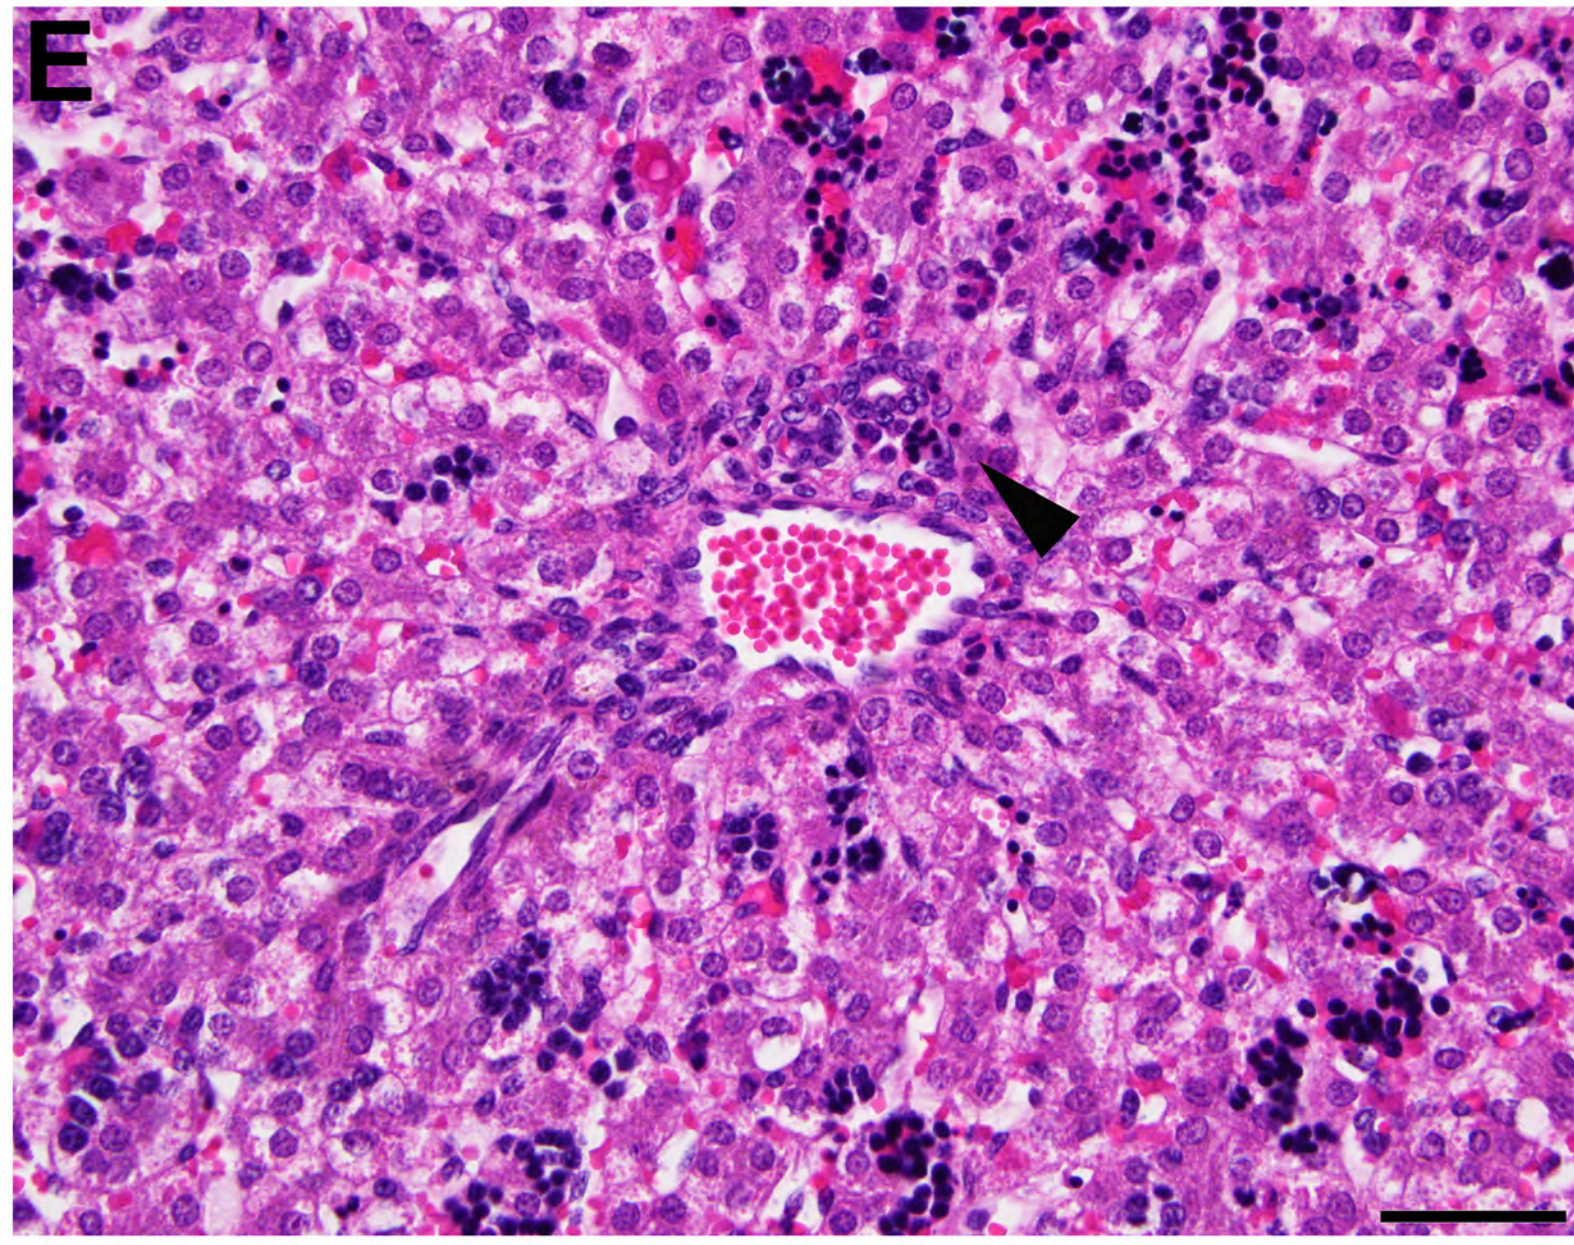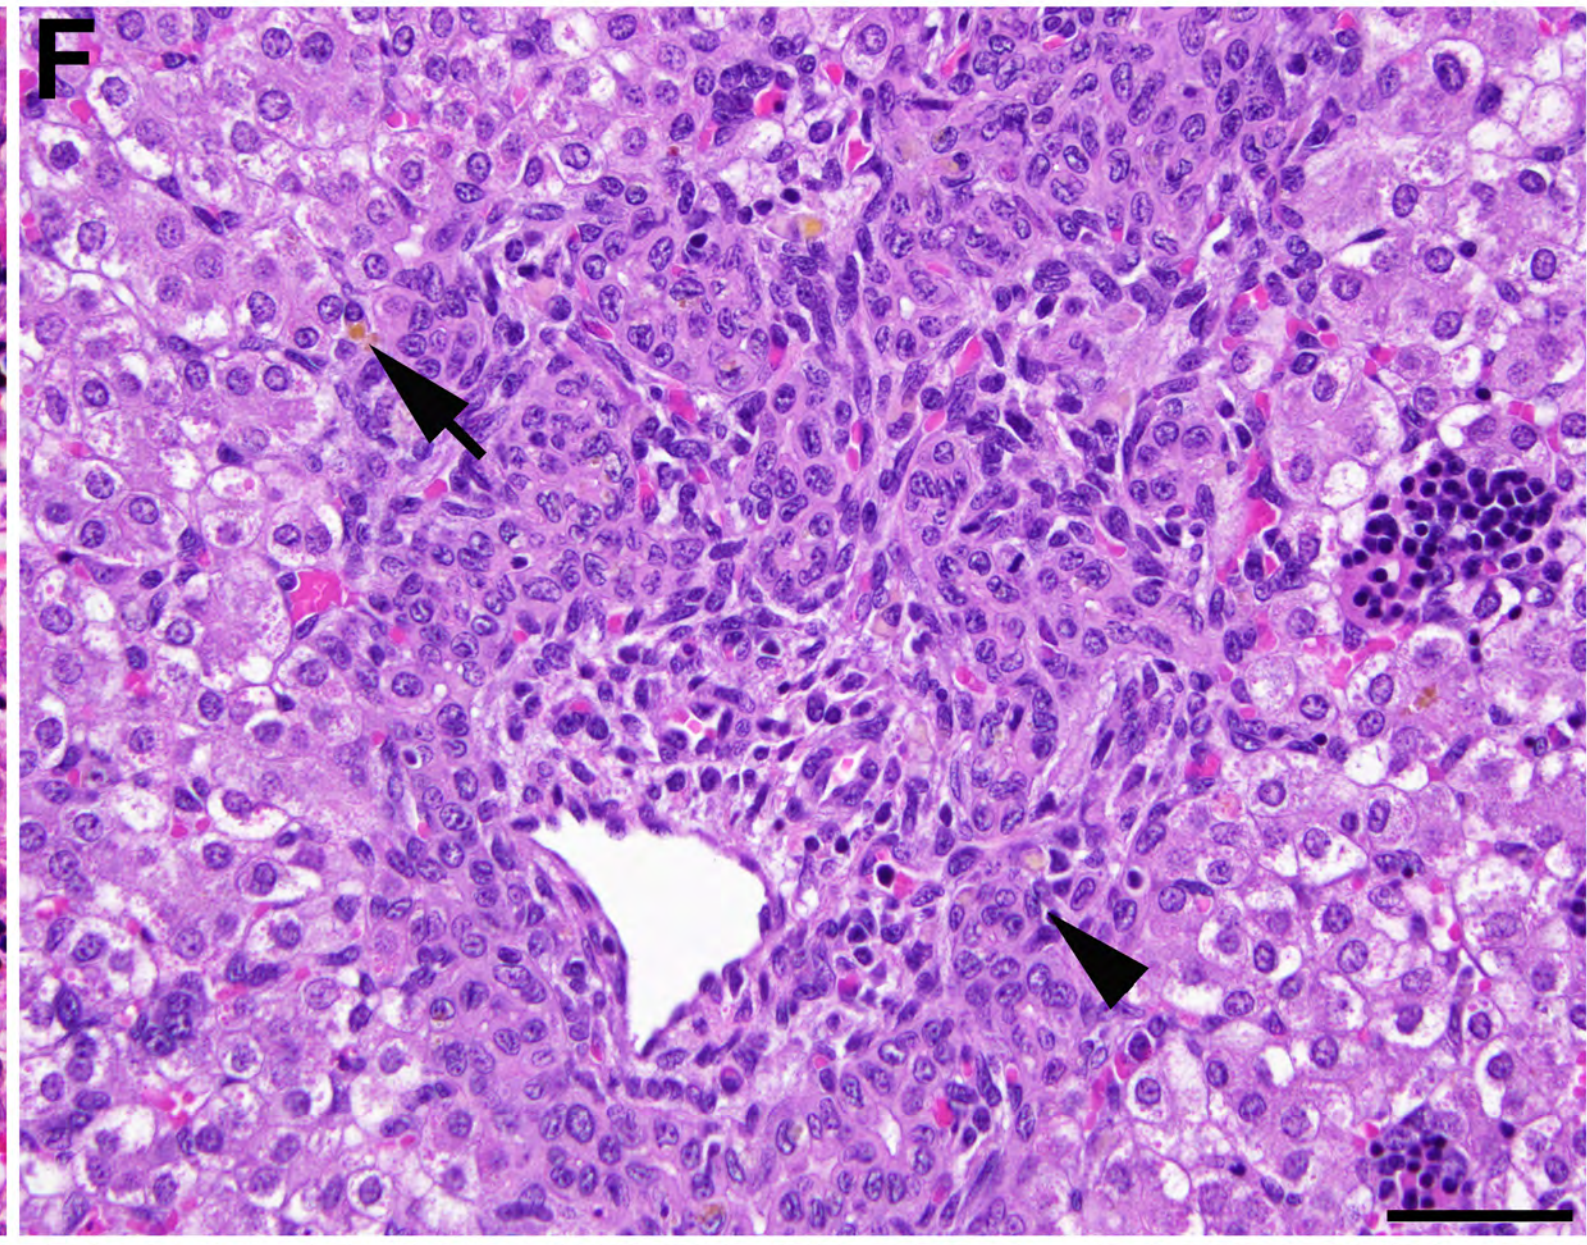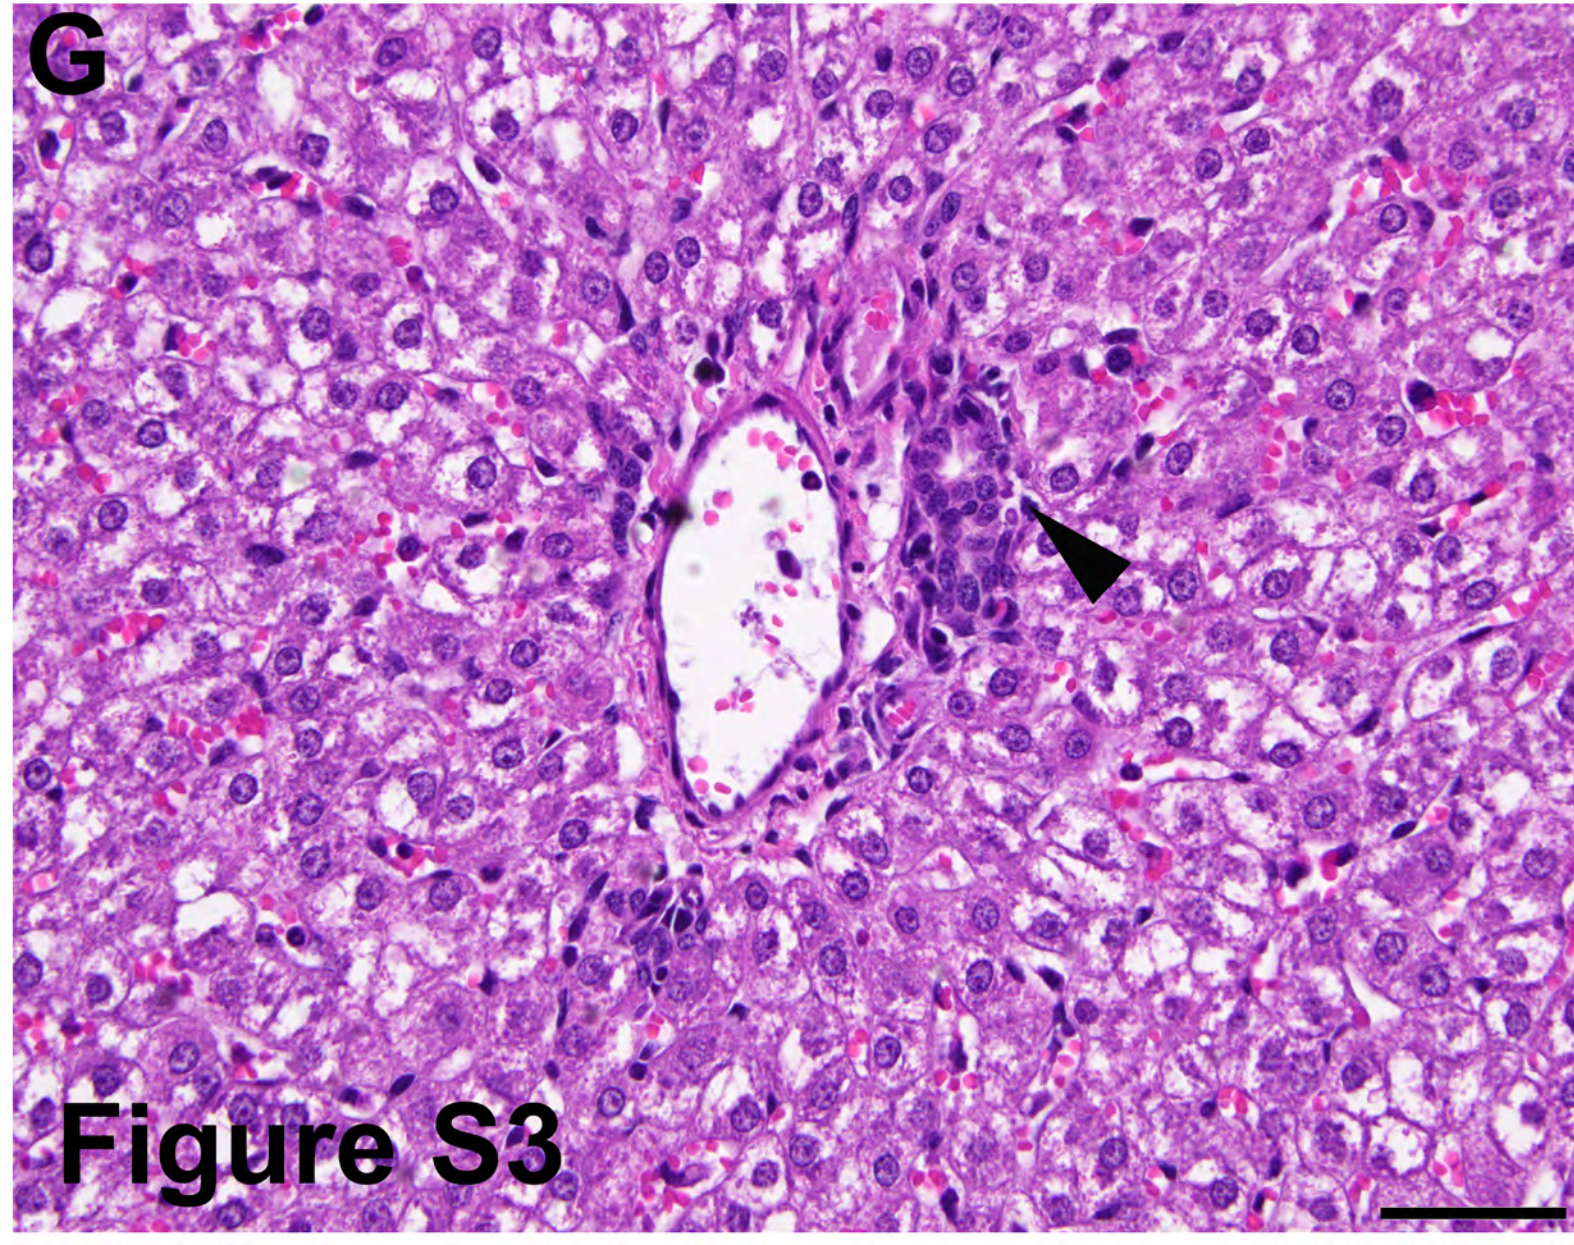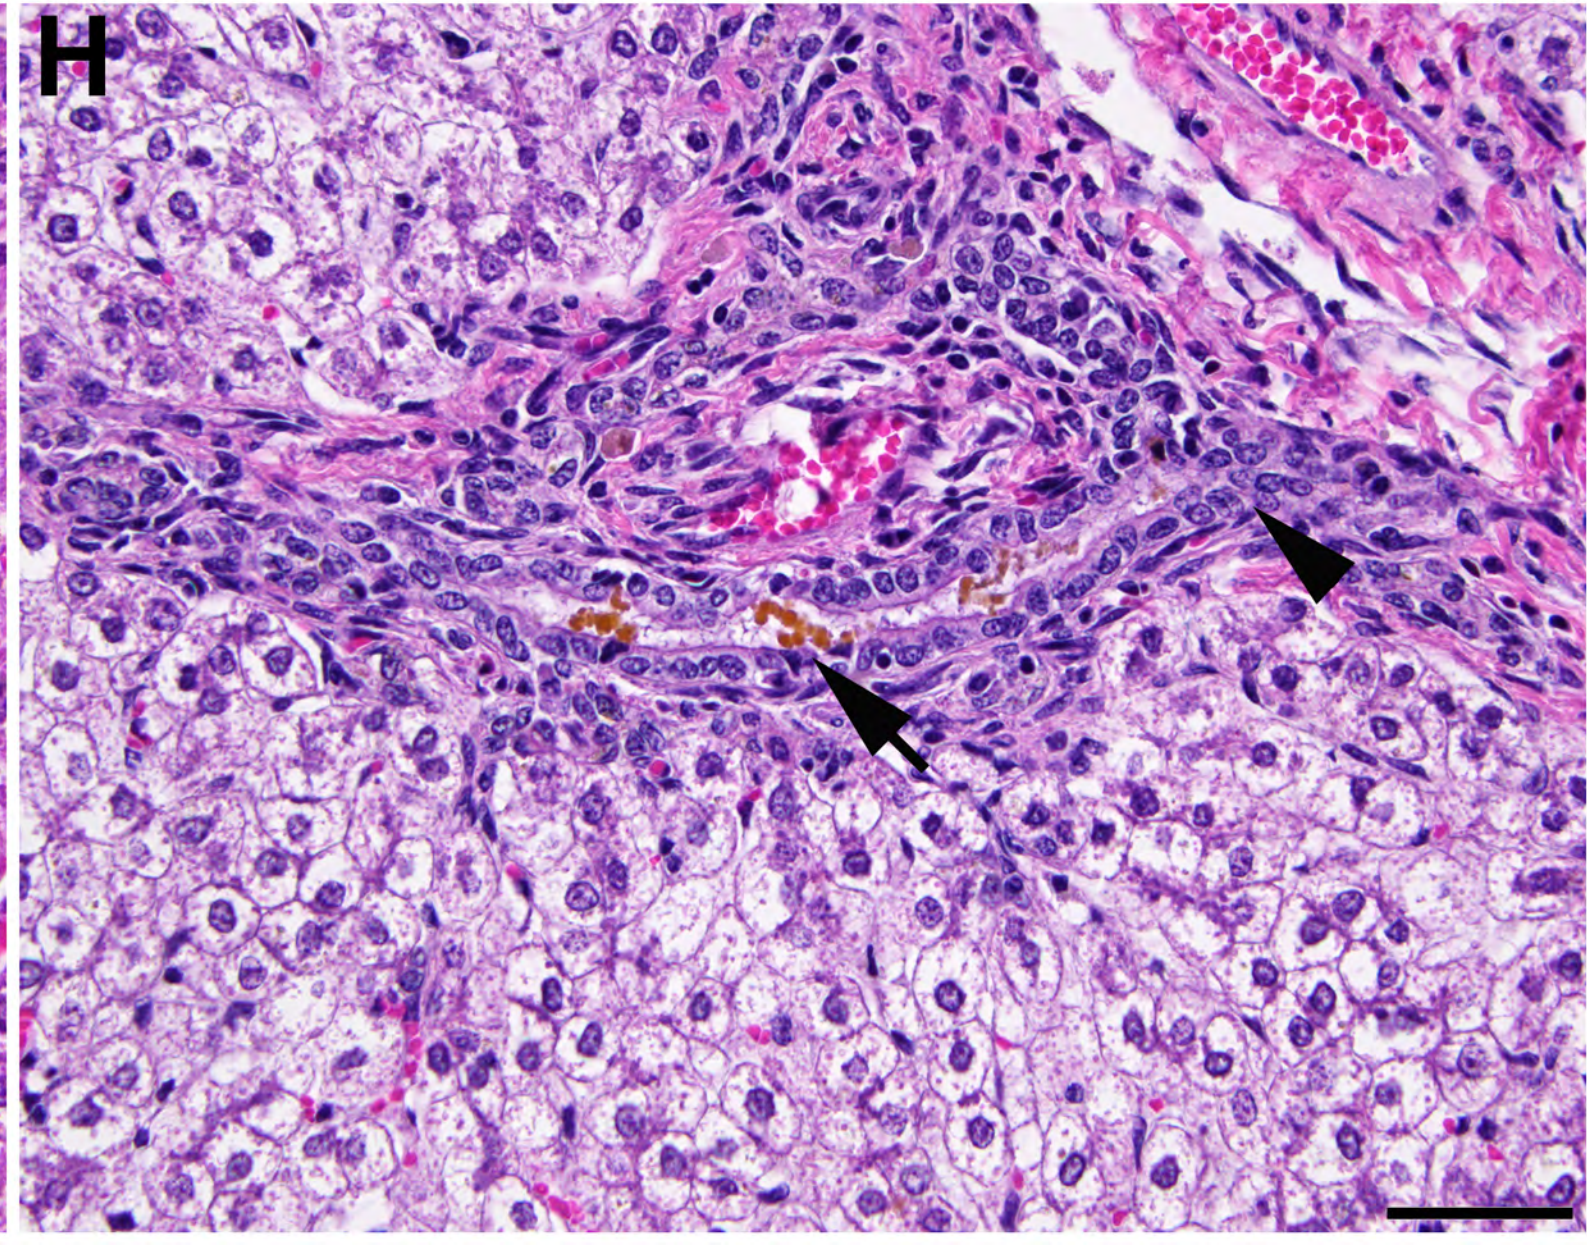

**Figure S3**

**A**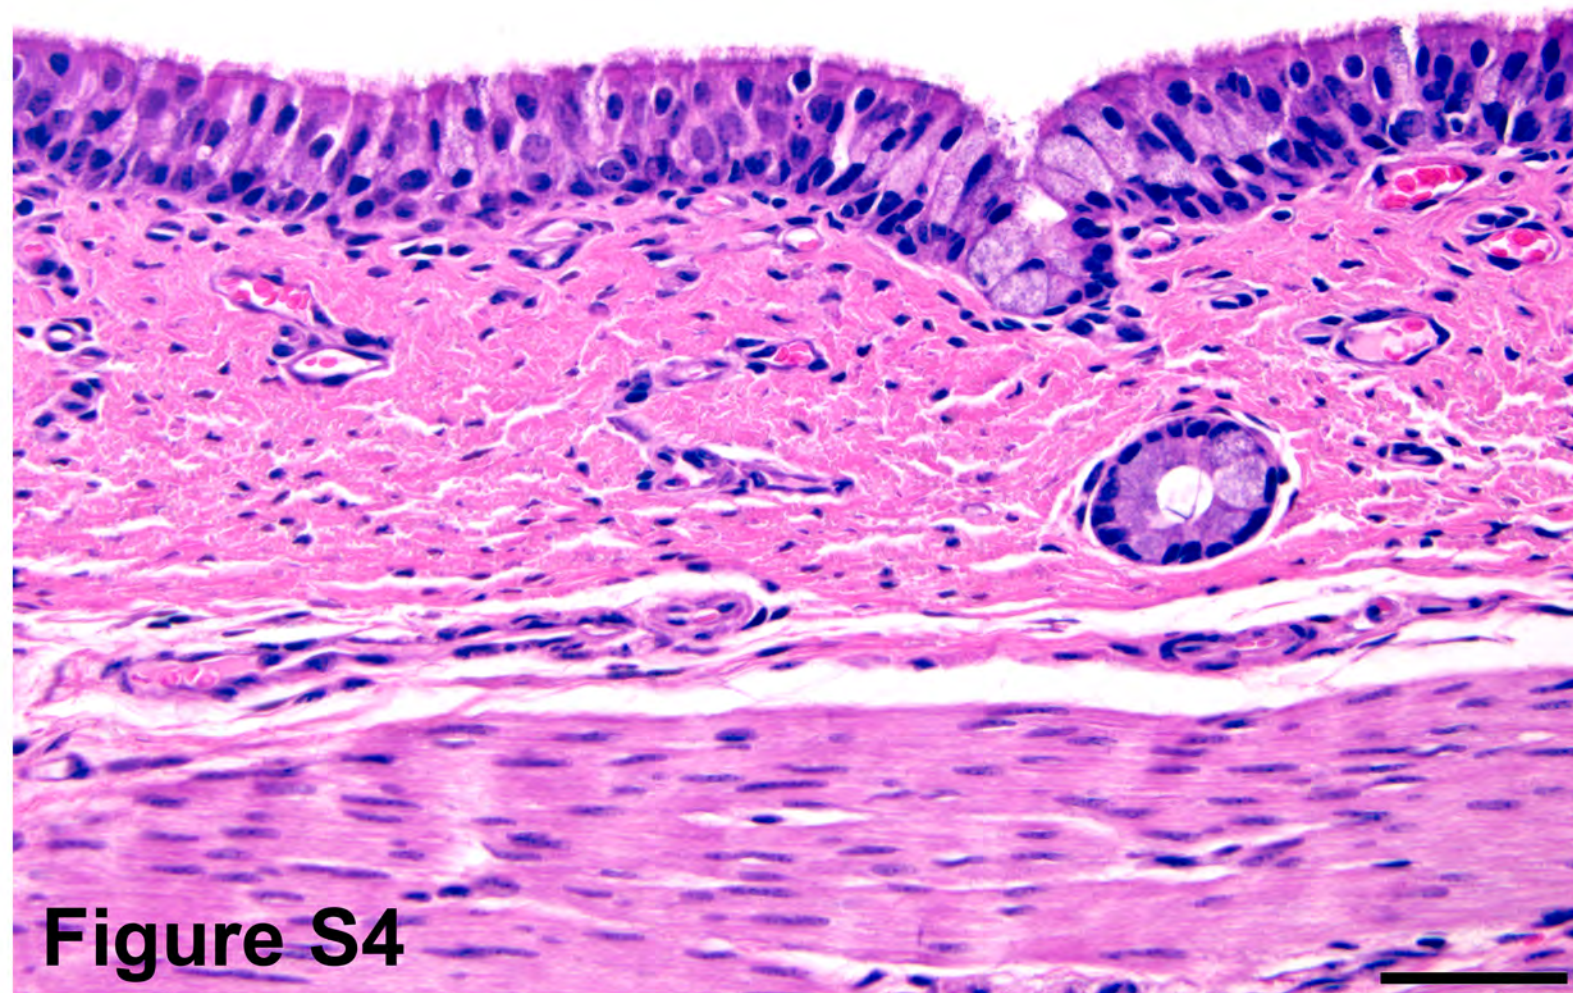**B**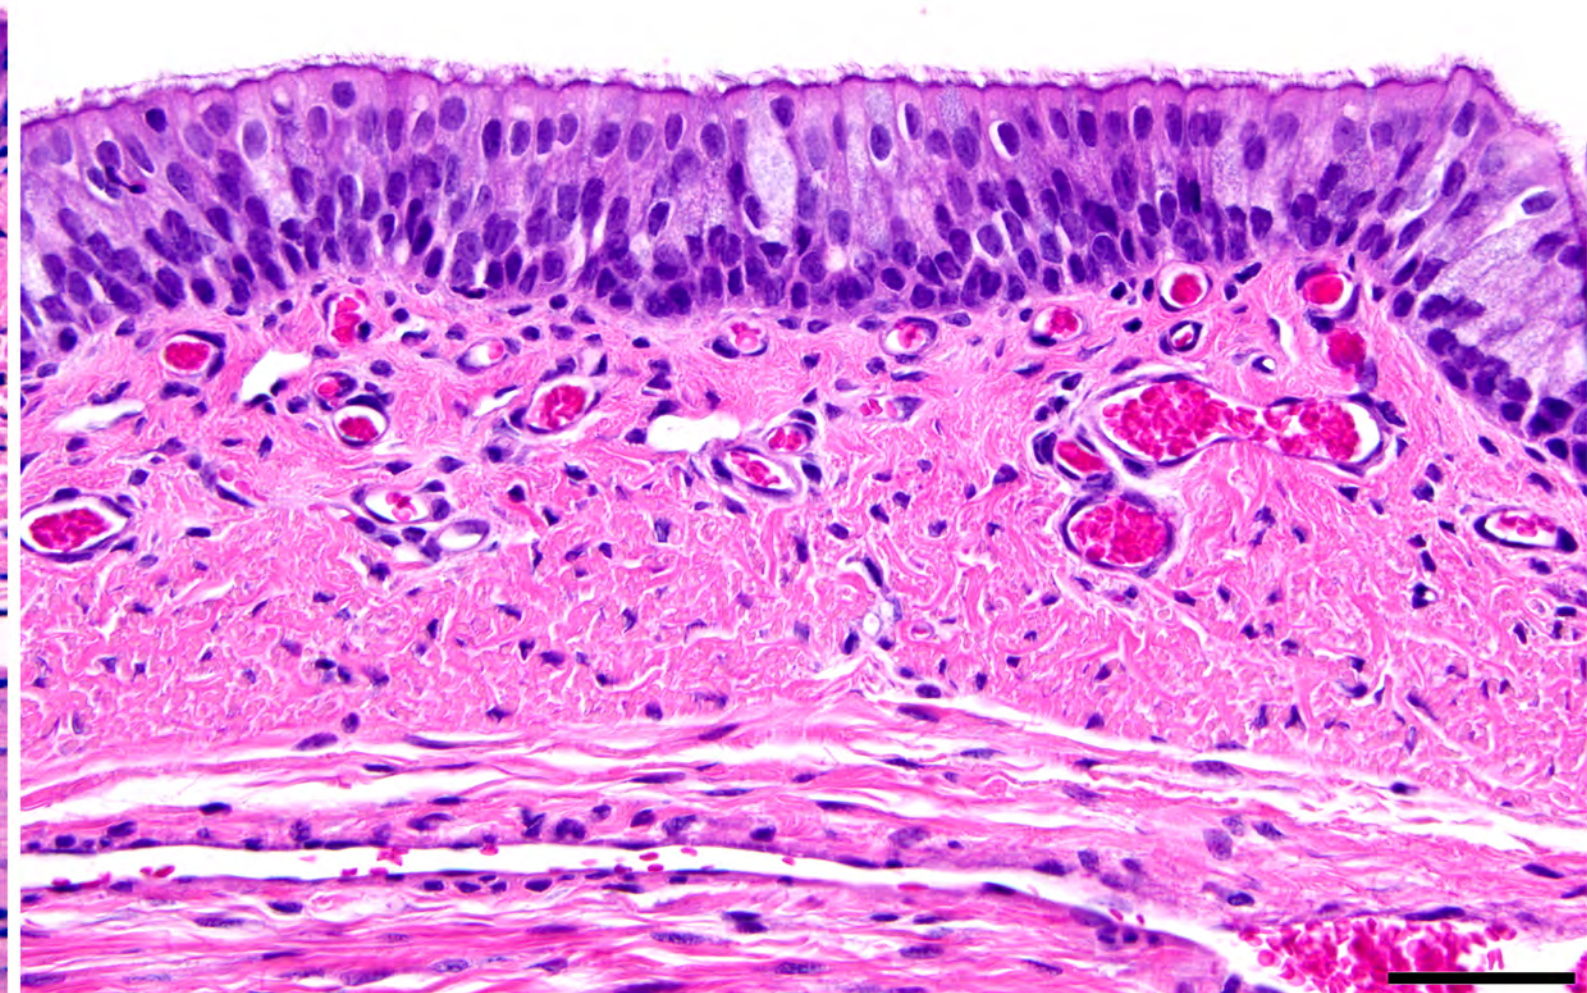**Figure S4**

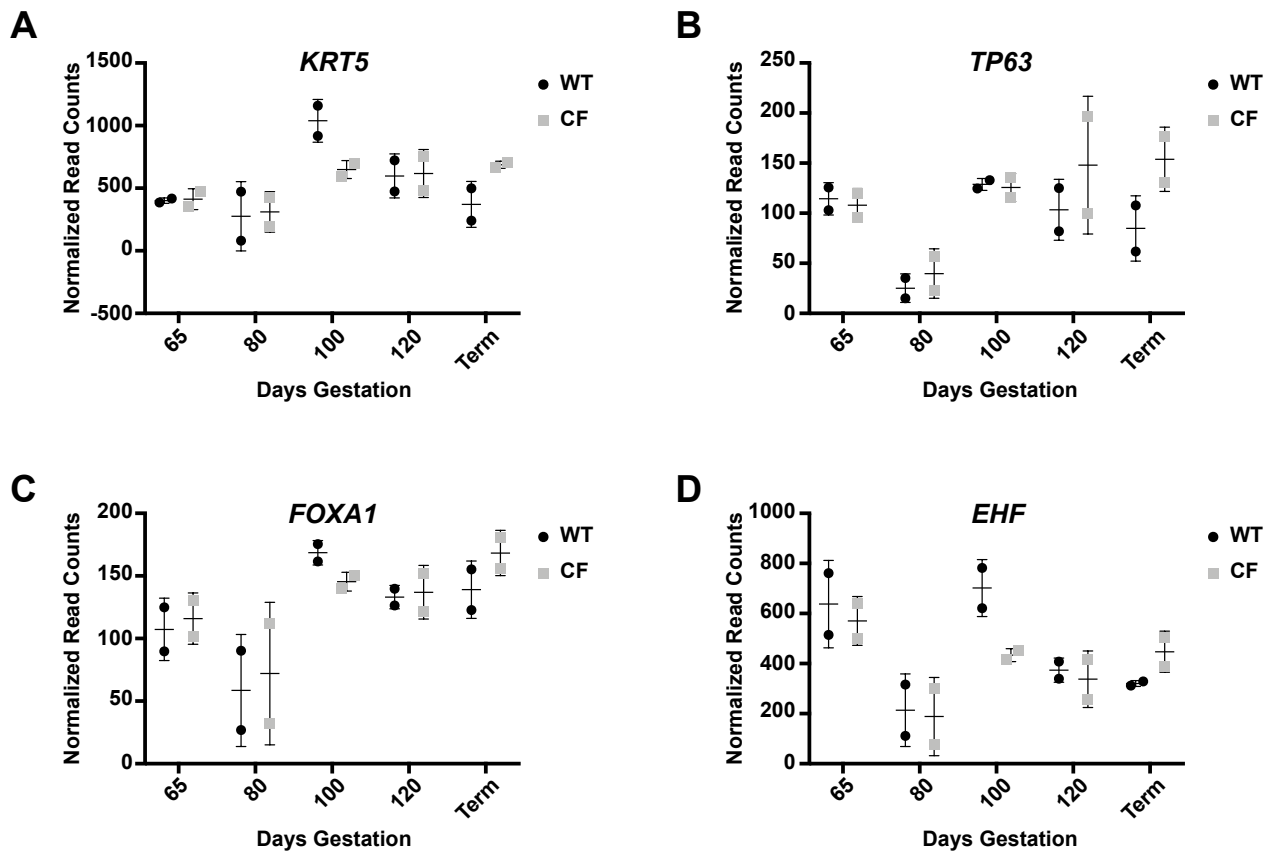

Figure S5

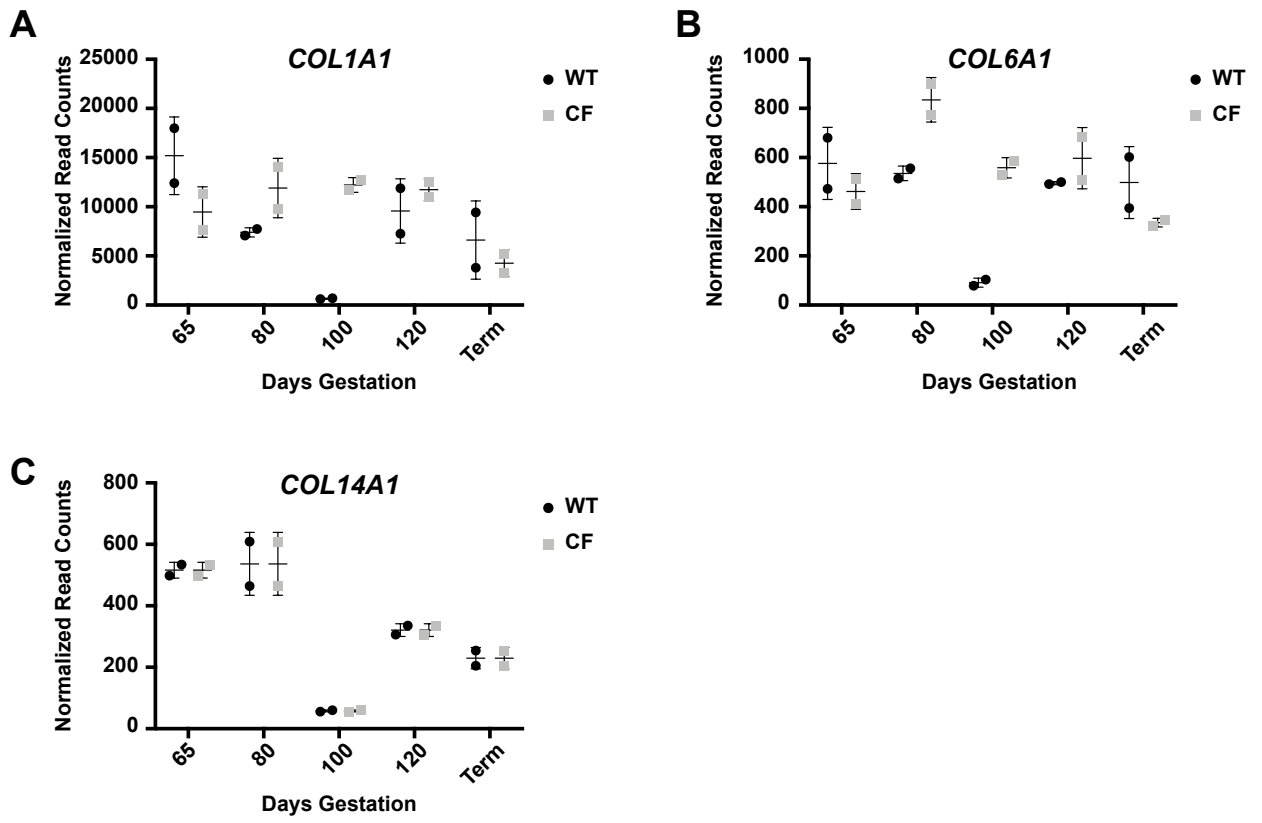

Figure S6

Supplement: FBA2-5-13-s002.pdf [file FBA2-5-13-s002.pdf]
